# Supplementary material for: Triacylglycerols are preferentially oxidized over free fatty acids in heated soybean oil
Source: PubMed Central journal article supplement (PMC8016982; doi:10.1038/s41538-021-00086-3), 2021-04-01
Supplement: 41538_2021_86_MOESM2_ESM.pdf [file 41538_2021_86_MOESM2_ESM.pdf]

## Supplementary information

### Triacylglycerols are preferentially oxidized over free fatty acids in heated soybean oil

Qing Shen<sup>a,b</sup>, Zhichao Zhang<sup>a</sup>, Shiva Emami<sup>a</sup>, Jianchu Chen<sup>b</sup>, Juliana Maria Leite

Nobrega de Moura Bell<sup>a,c</sup> and Ameer Y. Taha<sup>a,\*</sup>

<sup>a</sup> Department of Food Science and Technology, College of Agriculture and  
Environmental Sciences, University of California, Davis 95616, CA, United States

<sup>b</sup> College of Biosystems Engineering and Food Science, Zhejiang University,  
Hangzhou 310058, China

<sup>c</sup> Department of Biological and Agricultural Engineering, University of California,  
Davis, One Shields Avenue, Davis, CA 95616, USA

\*Corresponding author:

Dr. Ameer Y. Taha

Department of Food Science and Technology, College of Agriculture and  
Environmental Sciences, University of California Davis, Davis 95616, CA, United  
States

Phone: (+1) 530-752-7096

Email: [ataha@ucdavis.edu](mailto:ataha@ucdavis.edu)

**Supplementary Table 1.** Retention time, parent ion, product ion, fragmentor voltage and collision energy of the deuterated surrogate standards and unlabeled oxylipins.

| Name                         | Surrogate used     | RT<br>(min) | Parent ion<br>(m/z) | Product<br>ion (m/z) | Fragmentor<br>voltage (V) | Collision<br>energy (V) |
|------------------------------|--------------------|-------------|---------------------|----------------------|---------------------------|-------------------------|
| <b>Surrogate</b>             |                    |             |                     |                      |                           |                         |
| d-11-11(12)-EpEtrE           | NA                 | 23.3        | 330.2               | 207.1                | 130                       | 7                       |
| d11-14,15-DiHETrE            | NA                 | 13.3        | 348.2               | 207.1                | 110                       | 12                      |
| d4-6-keto-PGF1a              | NA                 | 4.3         | 373.3               | 157.1                | 110                       | 25                      |
| d4-9-HODE                    | NA                 | 17.5        | 299.2               | 172.3                | 80                        | 10                      |
| d4-LTB4                      | NA                 | 11.5        | 339.2               | 197.2                | 80                        | 10                      |
| d4-PGE2                      | NA                 | 6.7         | 355.2               | 275.3                | 90                        | 10                      |
| d4-TXB2                      | NA                 | 5.8         | 373.3               | 173.2                | 100                       | 12                      |
| d6-20-HETE                   | NA                 | 15.9        | 325.2               | 281.2                | 70                        | 12                      |
| d8-5-HETE                    | NA                 | 20.6        | 327.2               | 116.1                | 70                        | 7                       |
| <b>LA-derived oxylipins</b>  |                    |             |                     |                      |                           |                         |
| 9-HODE                       | d4-9-HODE          | 17.5        | 295.2               | 171.1                | 110                       | 12                      |
| 13-HODE                      | d4-9-HODE          | 17.5        | 295.2               | 195.2                | 100                       | 7                       |
| 9-oxo-ODE                    | d6-20-HETE         | 19.4        | 293.2               | 185.1                | 100                       | 12                      |
| 13-oxo-ODE                   | d6-20-HETE         | 18.6        | 293.2               | 195.1                | 120                       | 15                      |
| 9(10)-EpOME                  | d-11-11(12)-EpEtrE | 22.2        | 295.3               | 171.1                | 100                       | 12                      |
| 12(13)-EpOME                 | d-11-11(12)-EpEtrE | 21.8        | 295.3               | 195.2                | 100                       | 12                      |
| 9,10-DiHOME                  | d11-14,15-DiHETrE  | 12.7        | 313.2               | 201.2                | 120                       | 12                      |
| 12,13-DiHOME                 | d11-14,15-DiHETrE  | 12.2        | 313.2               | 183.2                | 110                       | 15                      |
| 9,10,13-TriHOME              | d4-PGE2            | 6.4         | 329.2               | 171.1                | 120                       | 8                       |
| 9,12,13-TriHOME              | d4-PGE2            | 6.3         | 329.2               | 211.1                | 120                       | 8                       |
| <b>ALA-derived oxylipins</b> |                    |             |                     |                      |                           |                         |
| 9-HOTrE                      | d4-9-HODE          | 14.7        | 293.2               | 171.2                | 120                       | 10                      |
| 13-HOTrE                     | d4-9-HODE          | 15.1        | 293.2               | 195.1                | 100                       | 10                      |

**Supplementary Table 2.** Matrix effects (i.e. % ion suppression or enhancement) following oxylipin analysis in different soybean oil volumes. Ion enhancement: >100%; ion suppression: <100%. Data are n=1 per group.

|                                    | Volume of soybean oil (μL) |     |     |     |
|------------------------------------|----------------------------|-----|-----|-----|
|                                    | 1                          | 2   | 5   | 10  |
| <b>Total LA-derived oxylipins</b>  |                            |     |     |     |
| 9-HODE                             | 114                        | 124 | 134 | 116 |
| 13-HODE                            | 125                        | 143 | 146 | 133 |
| 9-oxo-ODE                          | 108                        | 113 | 105 | 103 |
| 13-oxo-ODE                         | 115                        | 120 | 133 | 136 |
| 9(10)-EpOME                        | 116                        | 151 | 131 | 129 |
| 12(13)-EpOME                       | 112                        | 136 | 119 | 118 |
| 9,10-DiHOME                        | 109                        | 127 | 117 | 115 |
| 12,13-DiHOME                       | 88                         | 95  | 100 | 99  |
| 9,10,13-TriHOME                    | 99                         | 103 | 111 | 101 |
| 9,12,13-TriHOME                    | 103                        | 108 | 122 | 104 |
| <b>Total ALA-derived oxylipins</b> |                            |     |     |     |
| 9-HOTrE                            | 105                        | 121 | 129 | 115 |
| 13-HOTrE                           | 111                        | 122 | 136 | 119 |

**Supplementary Table 3.** Matrix effects (i.e. % ion suppression or enhancement) following hydrolysis of soybean oil with different base types. Ion suppression data are expressed at % of control. Ion enhancement: >100%; ion suppression: <100%. Data are n=1 per base condition.

| % of control                      | Base hydrolysis type            |      |
|-----------------------------------|---------------------------------|------|
|                                   | Na <sub>2</sub> CO <sub>3</sub> | NaOH |
| <b>Total LA-derived oxylipin</b>  |                                 |      |
| 9-HODE                            | 104                             | 127  |
| 13-HODE                           | 110                             | 132  |
| 9-oxo-ODE                         | 99                              | 101  |
| 13-oxo-ODE                        | 126                             | 102  |
| 9(10)-EpOME                       | 100                             | 102  |
| 12(13)-EpOME                      | 98                              | 104  |
| 9,10-DiHOME                       | 104                             | 113  |
| 12,13-DiHOME                      | 103                             | 110  |
| 9,10,13-TriHOME                   | 101                             | 99   |
| 9,12,13-TriHOME                   | 105                             | 106  |
| <b>Total ALA-derived oxylipin</b> |                                 |      |
| 9-HOTrE                           | 101                             | 120  |
| 13-HOTrE                          | 113                             | 127  |

**Supplementary Table 4.** Matrix effects (i.e. % ion suppression or enhancement) following separation of free oxylipins from esterified oxylipins in 1, 2, 5 or 8  $\mu\text{L}$  soybean oil with silica columns. Data are n=1 per oil volume. Ion enhancement: >100%; ion suppression: <100%.

| % of control                     | Volume of soybean oil ( $\mu\text{L}$ ) |     |     |     |
|----------------------------------|-----------------------------------------|-----|-----|-----|
|                                  | 1                                       | 2   | 5   | 8   |
| <b>Free LA-derived oxylipin</b>  |                                         |     |     |     |
| 9-HODE                           | 96                                      | 102 | 107 | 110 |
| 13-HODE                          | 99                                      | 105 | 110 | 113 |
| 9-oxo-ODE                        | 100                                     | 105 | 101 | 109 |
| 13-oxo-ODE                       | 92                                      | 97  | 106 | 103 |
| 9(10)-EpOME                      | 92                                      | 100 | 98  | 102 |
| 12(13)-EpOME                     | 86                                      | 96  | 99  | 99  |
| 9,10-DiHOME                      | 96                                      | 106 | 109 | 112 |
| 12,13-DiHOME                     | 78                                      | 81  | 91  | 90  |
| 9,10,13-TriHOME                  | 99                                      | 107 | 111 | 116 |
| 9,12,13-TriHOME                  | 99                                      | 109 | 110 | 117 |
| <b>Free ALA-derived oxylipin</b> |                                         |     |     |     |
| 9-HOTrE                          | 104                                     | 113 | 115 | 118 |
| 13-HOTrE                         | 100                                     | 107 | 111 | 114 |

**Supplementary Table 5.** Raw UPLC-MS/MS chromatograms of each of the 9 deuterated surrogate standards recovered in the polar and neutral lipid fractions following silica column separation of 1, 2, 5, and 8  $\mu\text{L}$  of soybean oil.

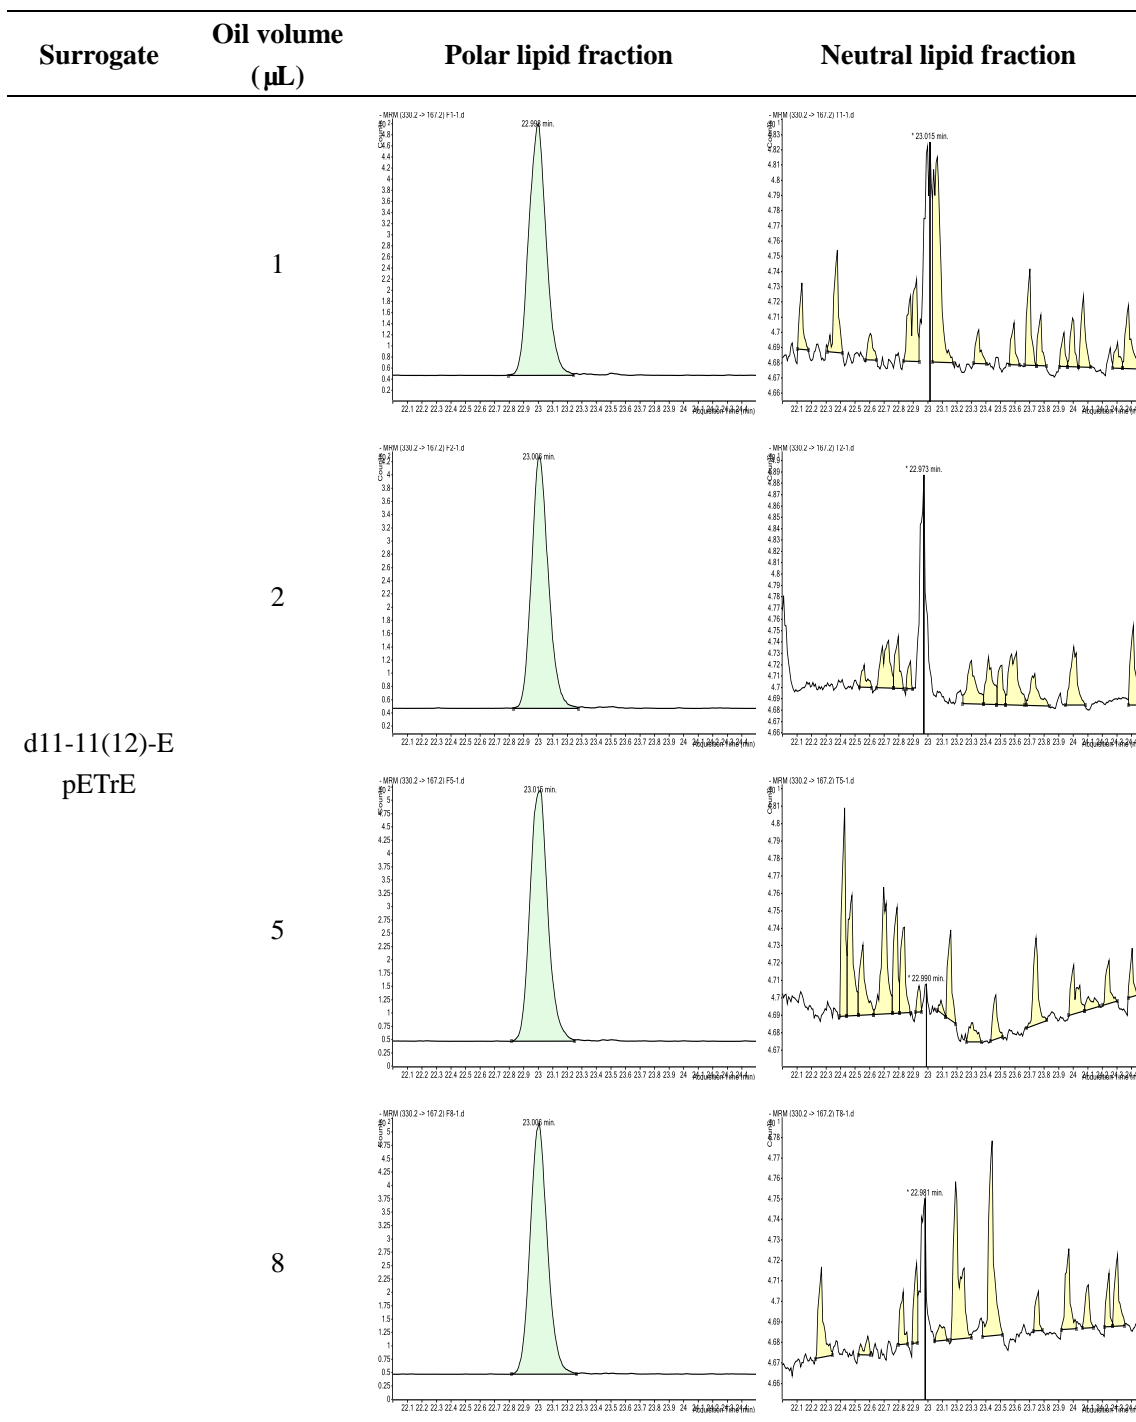

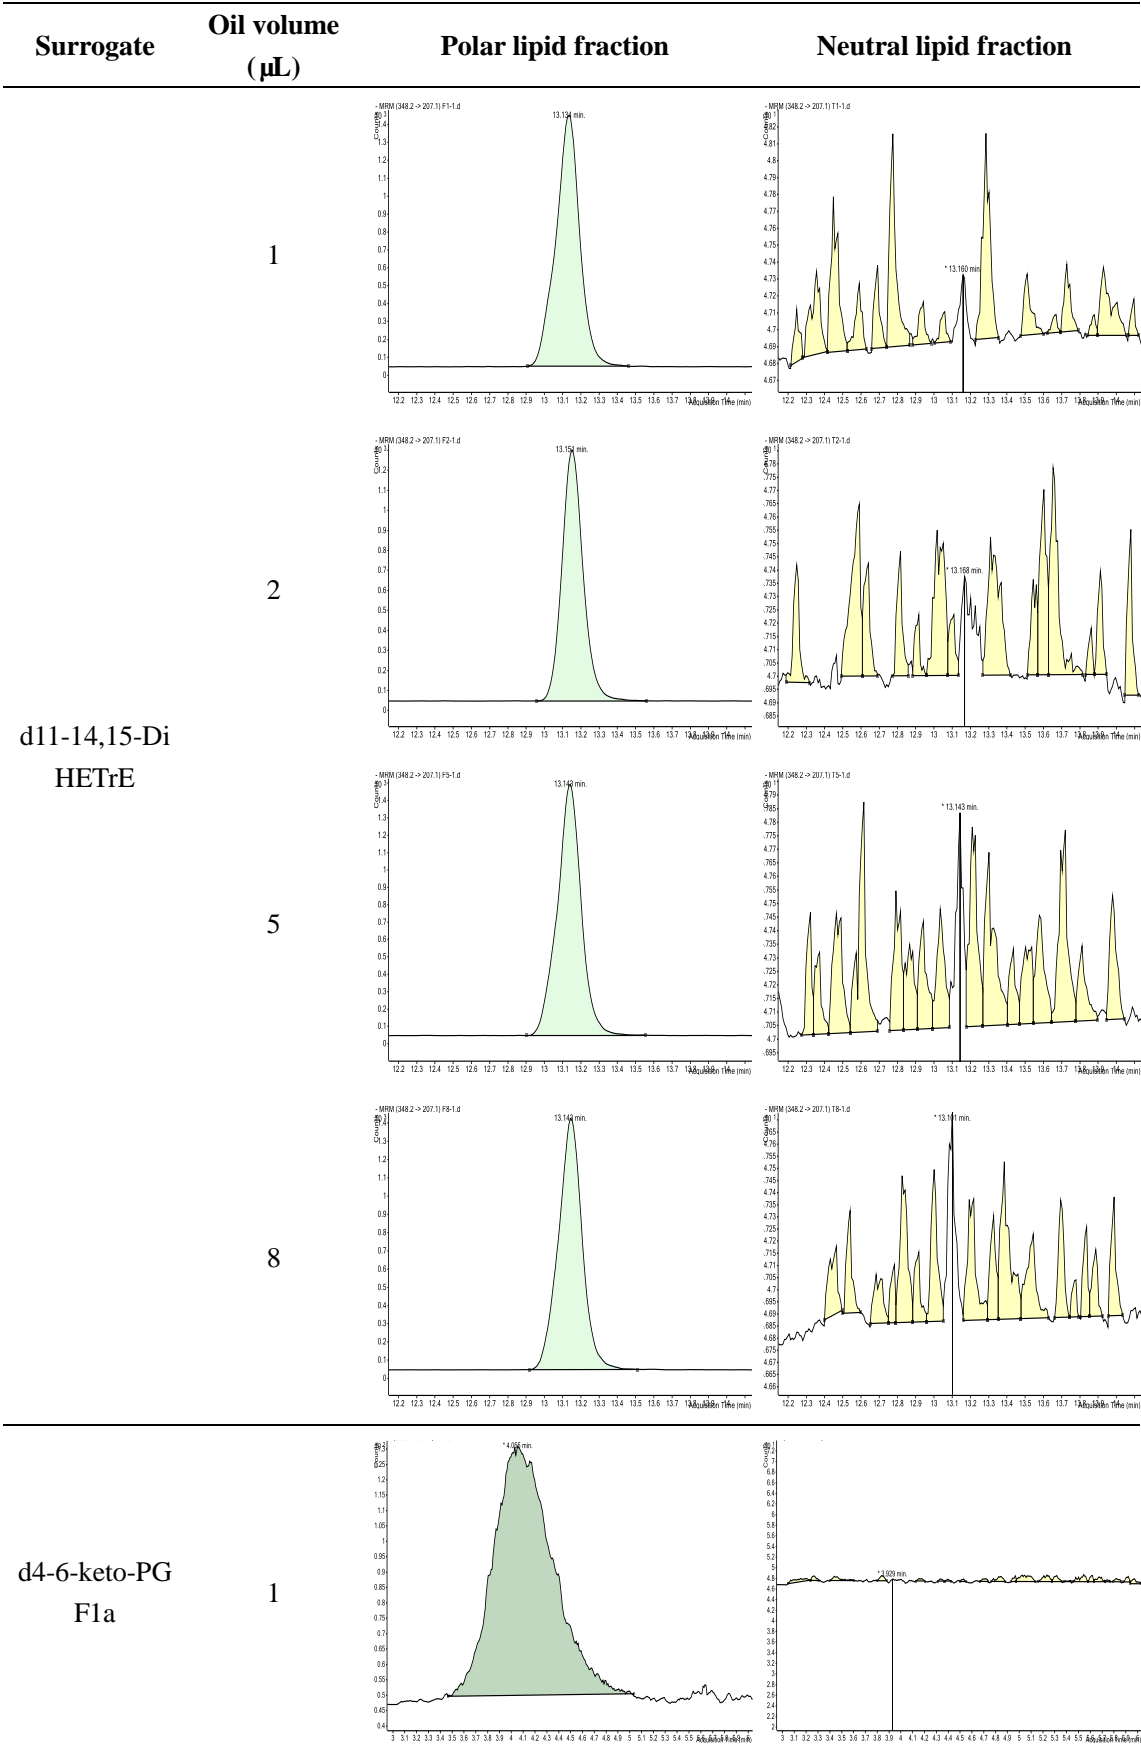

| Surrogate | Oil volume (μL) | Polar lipid fraction | Neutral lipid fraction |
|-----------|-----------------|----------------------|------------------------|
|-----------|-----------------|----------------------|------------------------|

2

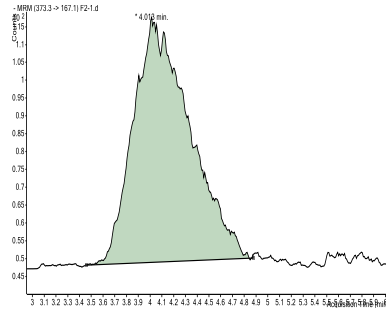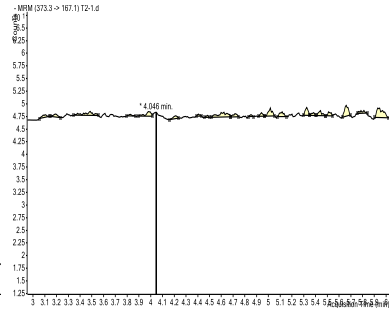

5

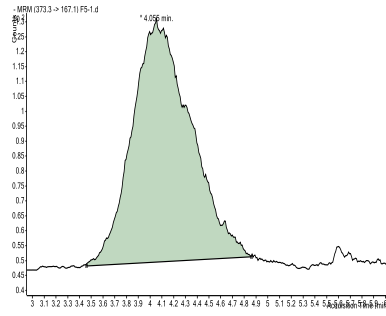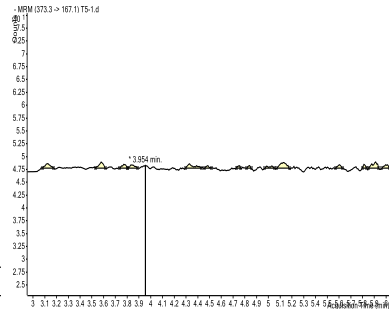

8

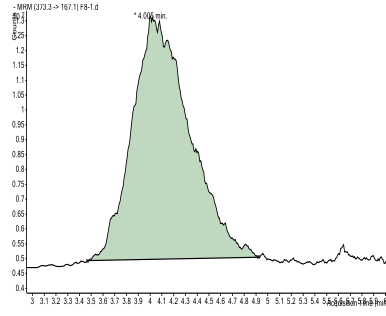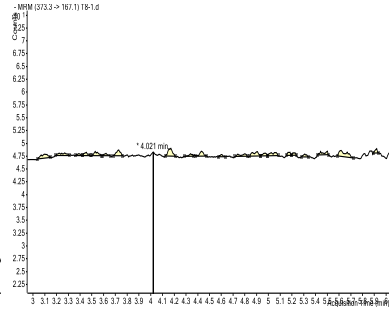

1

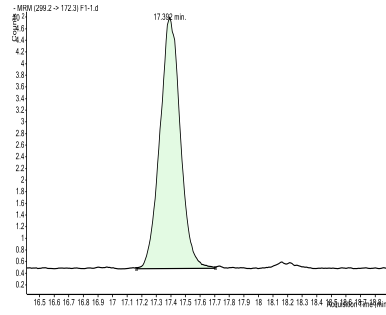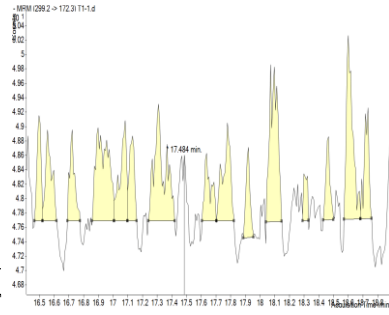

d4-9-HODE

2

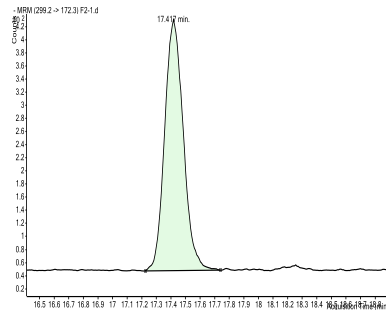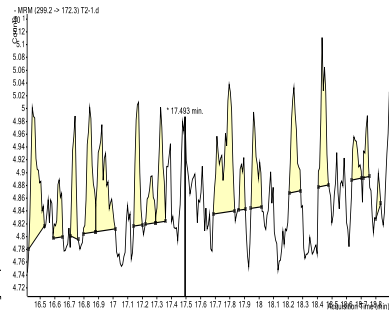



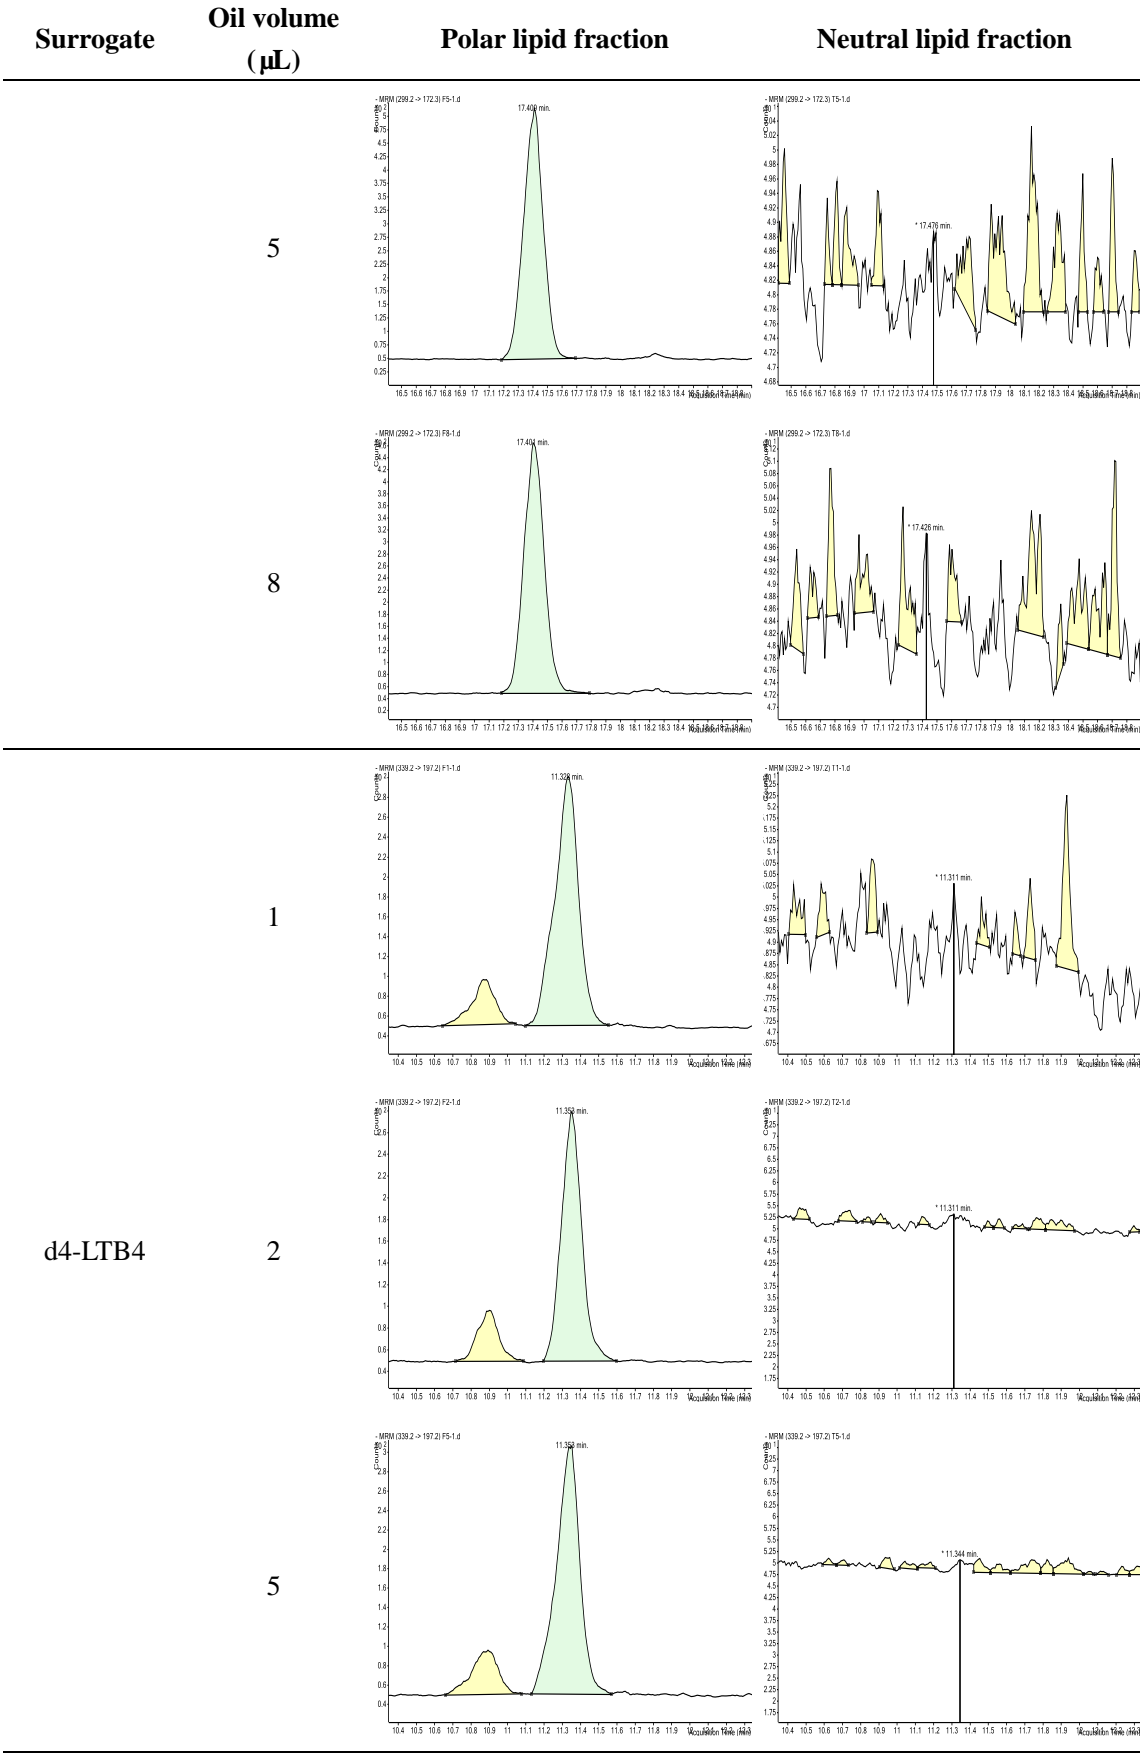

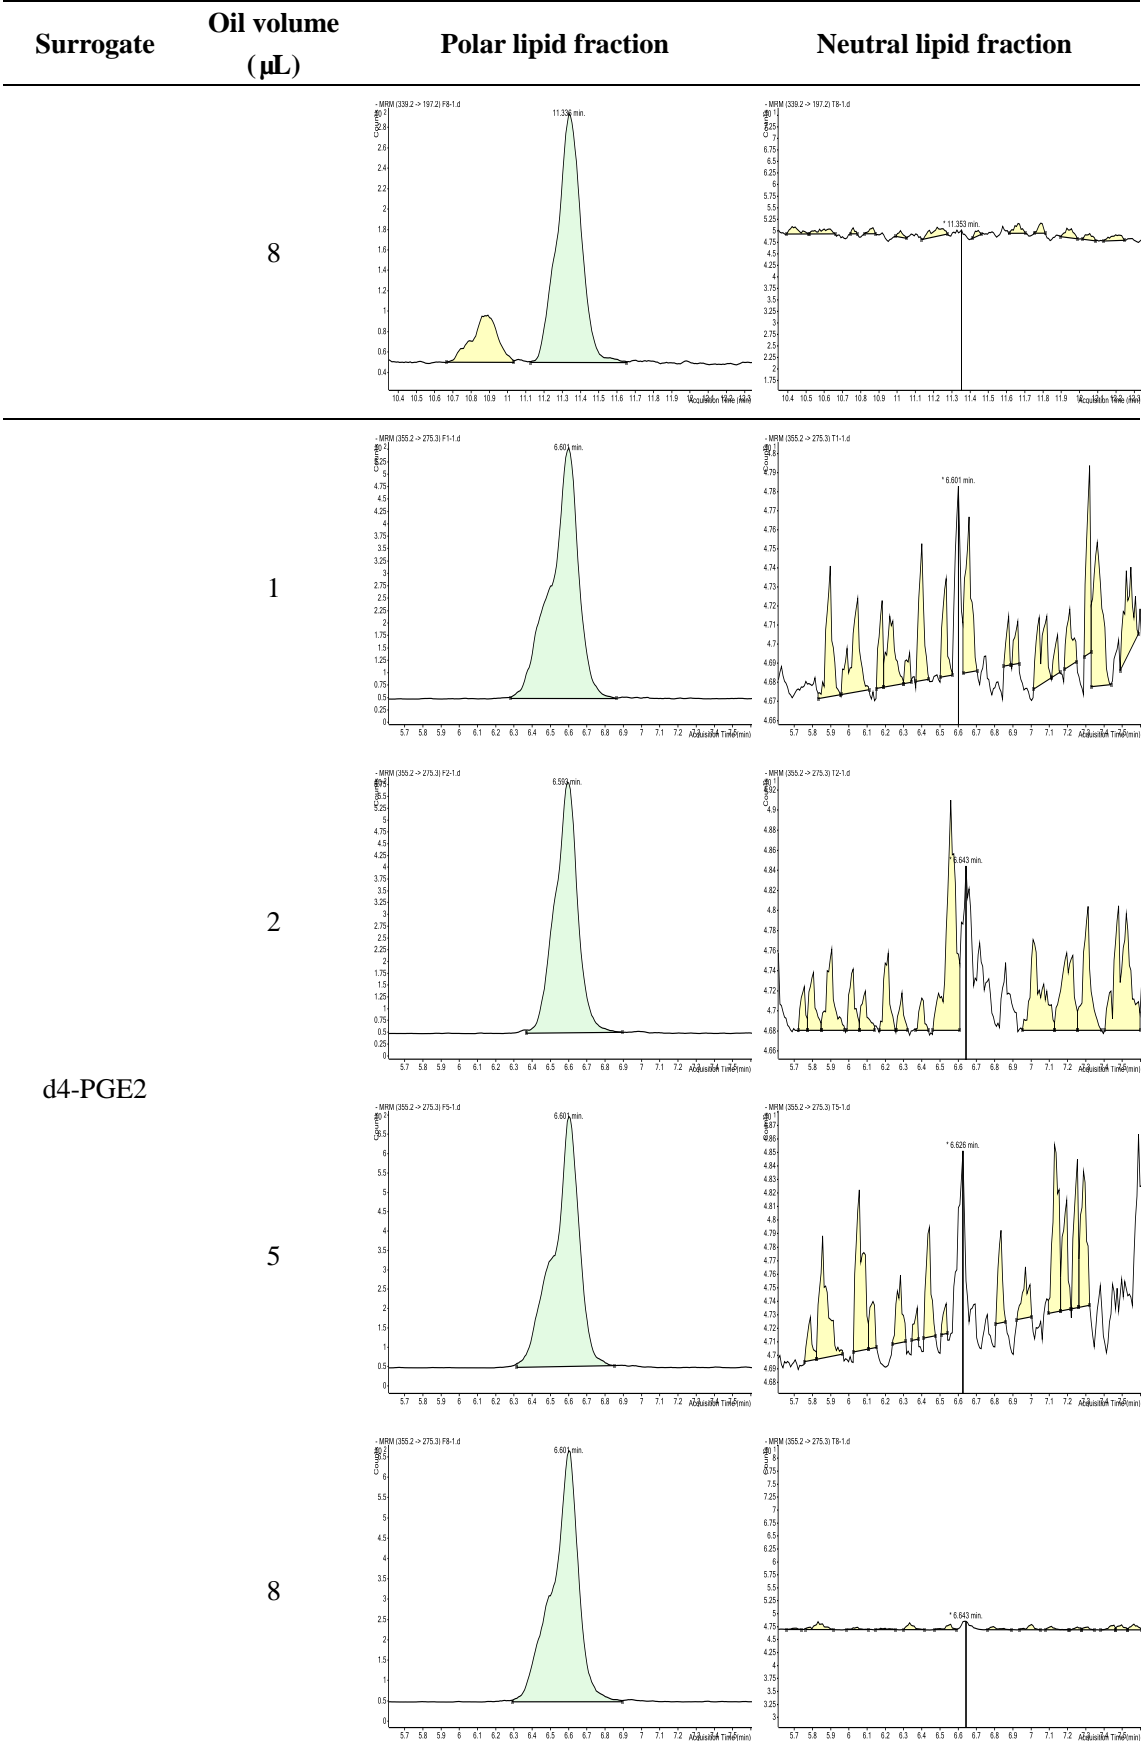

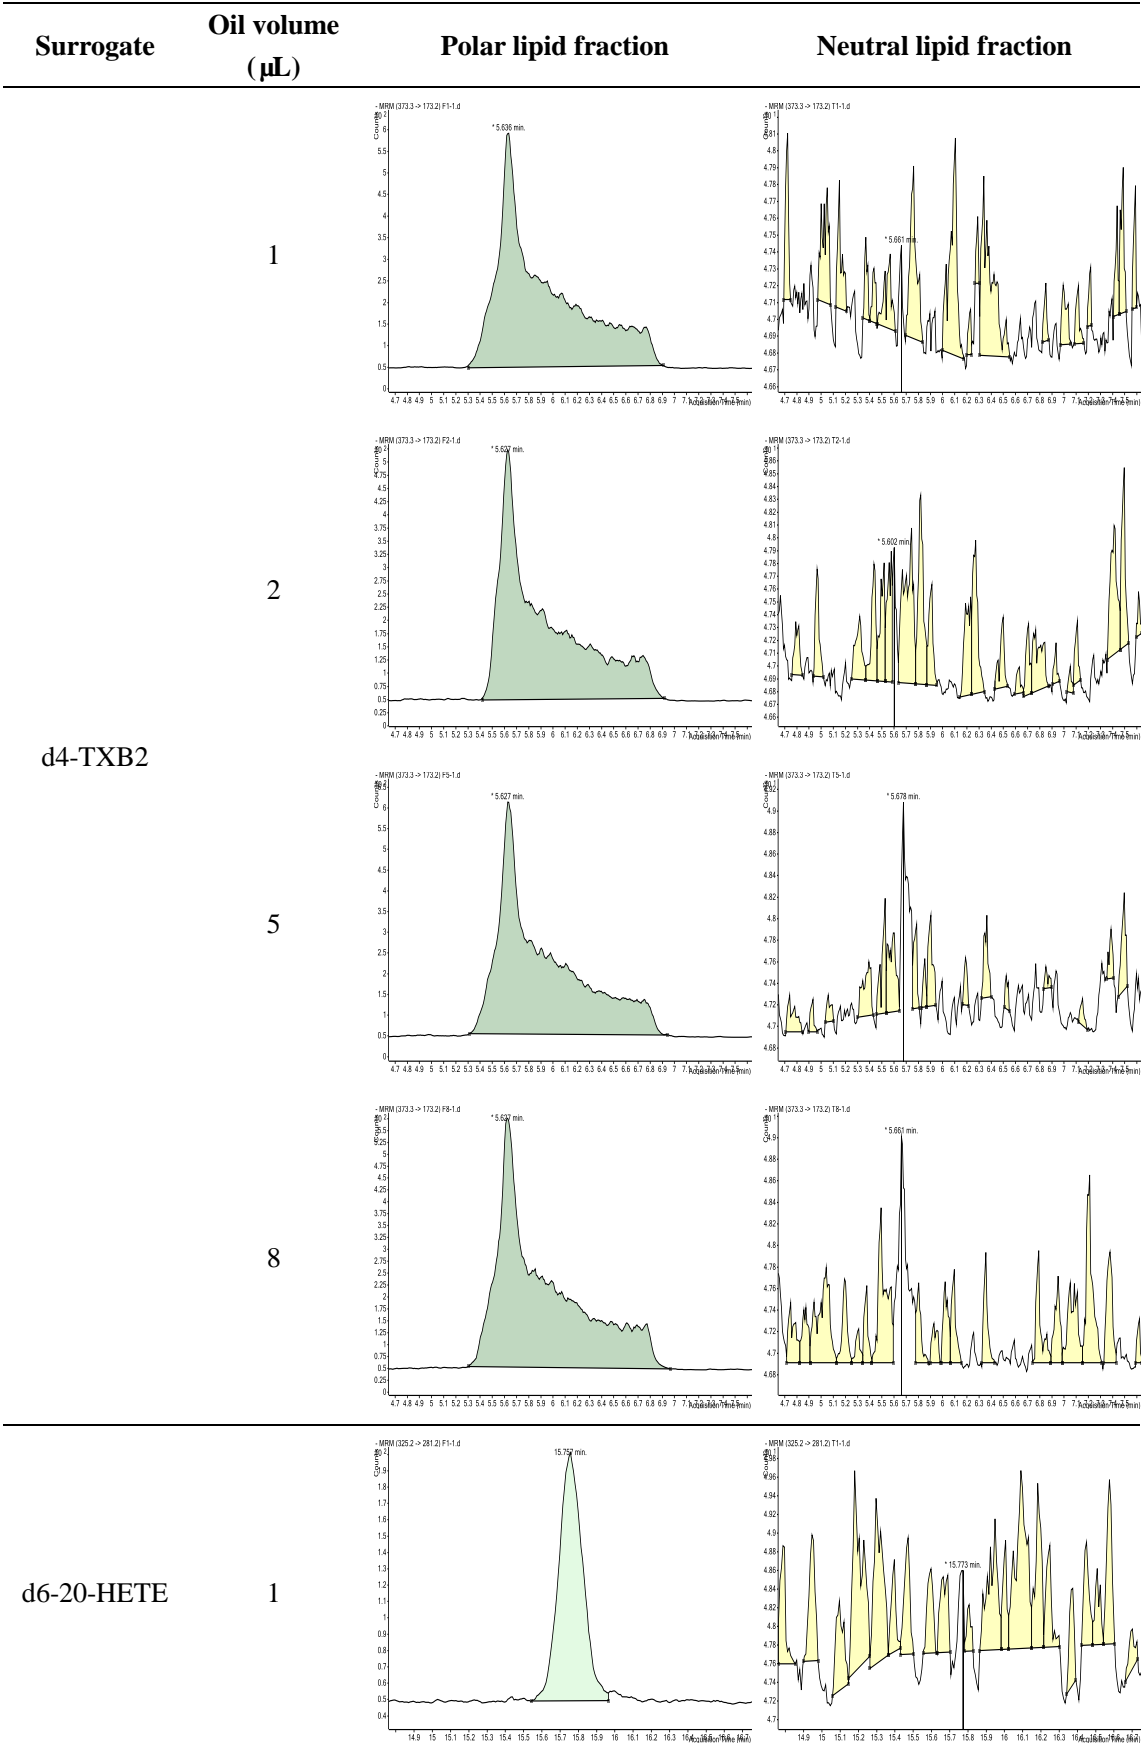

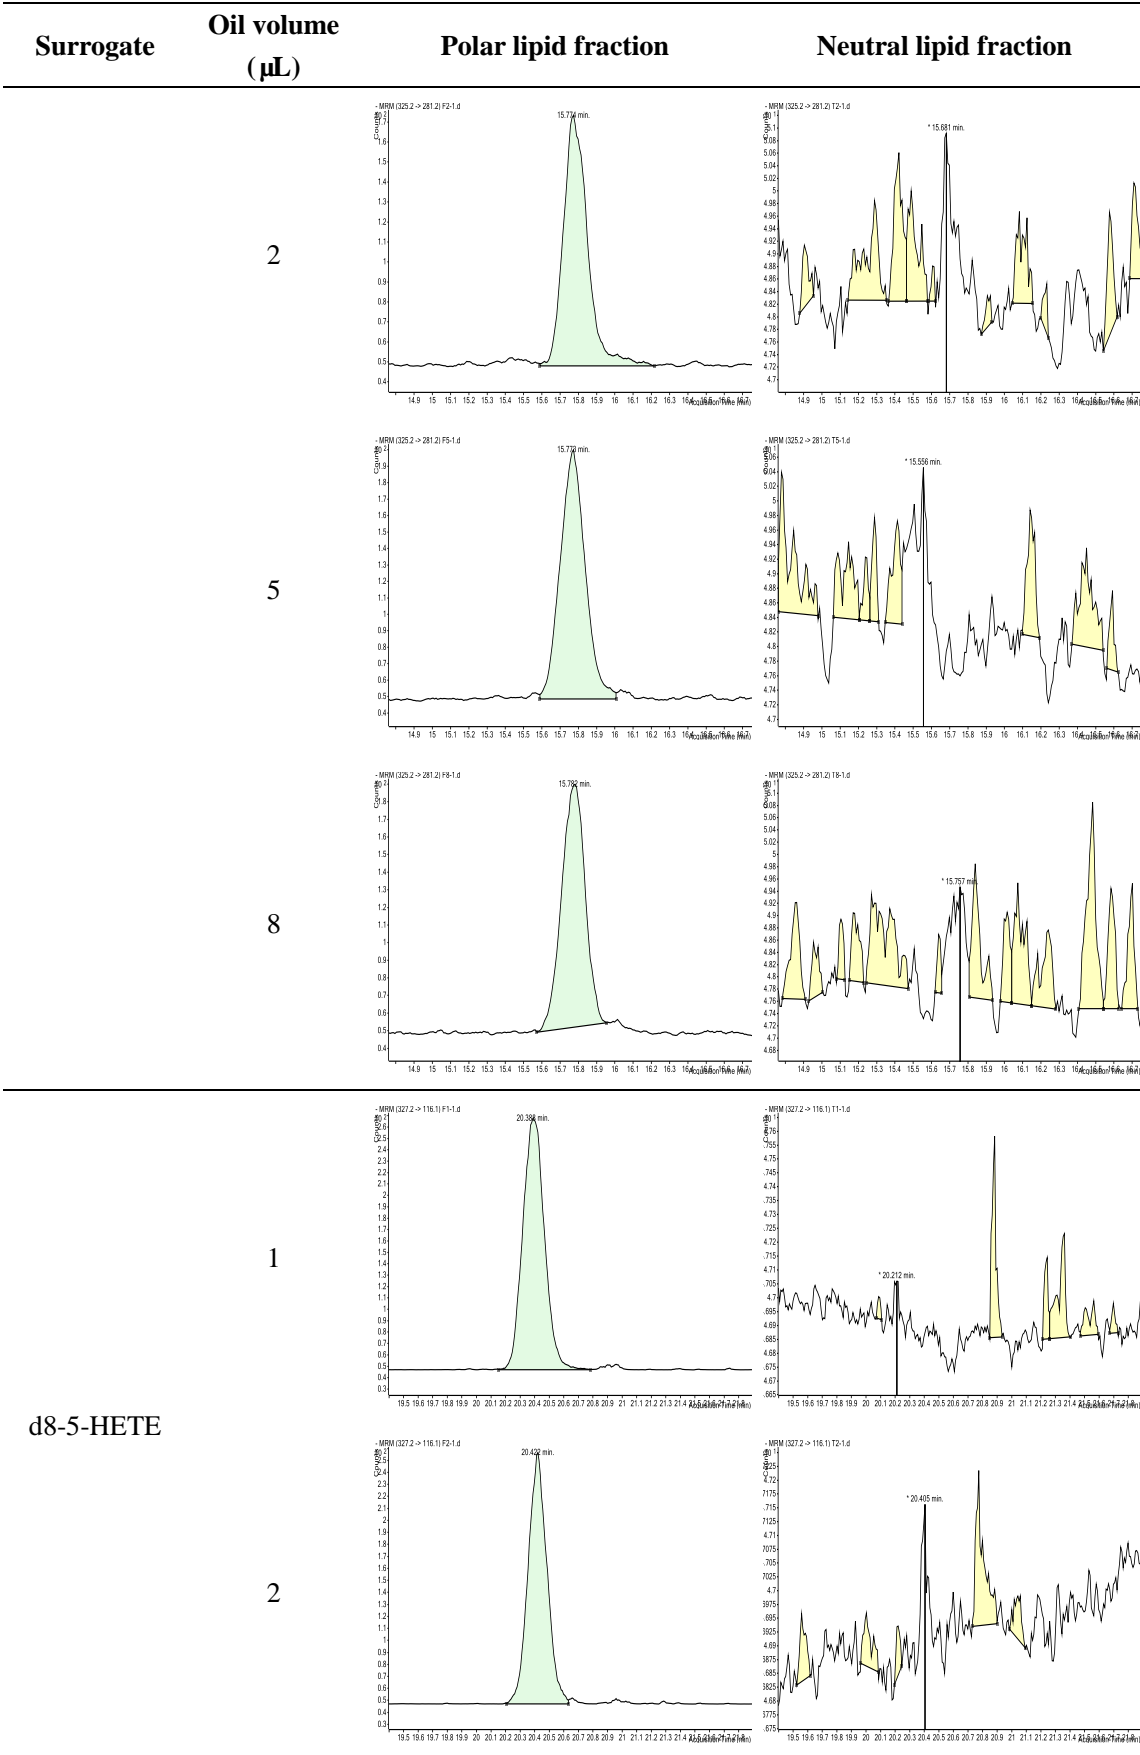

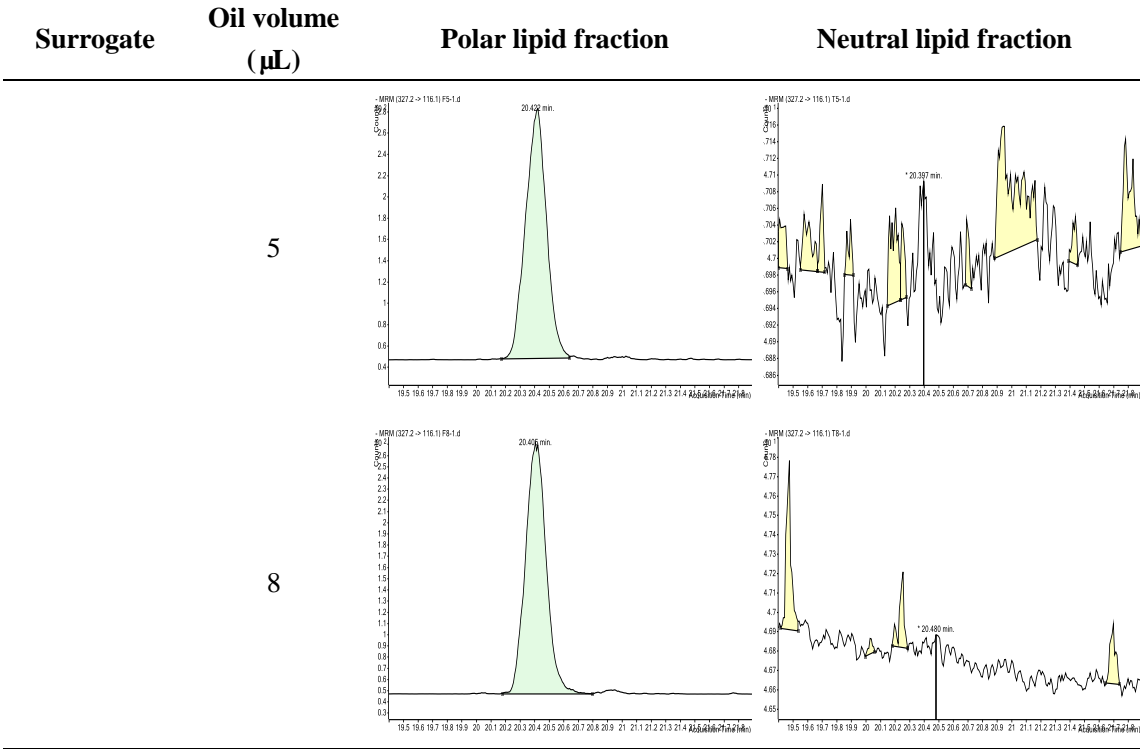

**Supplementary Table 6.** Retention time of the main fatty acids in soybean oil, as well as the internal standard used to quantify fatty acids.

| <b>Code</b>                            | <b>Name</b>                      | <b>RT (min)</b> |
|----------------------------------------|----------------------------------|-----------------|
| <b>Main fatty acids in soybean oil</b> |                                  |                 |
| C16:0                                  | Palmitic Acid/Hexadecanoic Acid  | 14.7            |
| C18:0                                  | Stearic Acid/Octadecanoic Acid   | 17.2            |
| C18:1 CIS                              | Oleic Acid                       | 17.4            |
| C18:2 n-6                              | Linoleic Acid (LA)               | 18.0            |
| C18:3 n-3                              | linolenic acid (ALA)             | 18.9            |
| <b>Internal standard</b>               |                                  |                 |
| C17:0                                  | Margaric acid/Heptadecanoic acid | 15.9            |

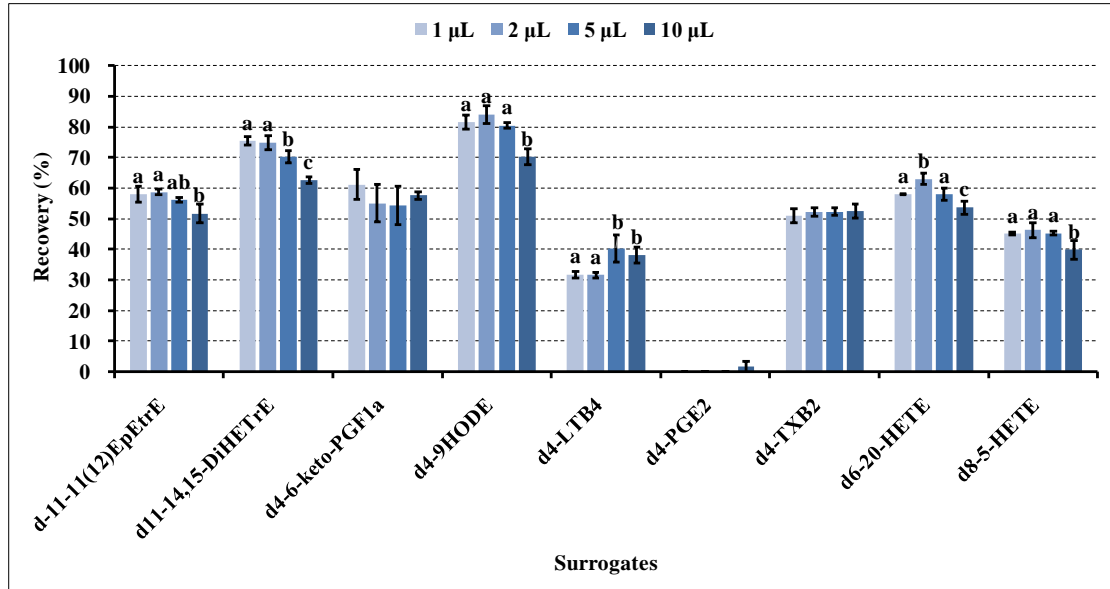

**Supplementary Figure 1.** Surrogate standard recovery from 1, 2, 5 and 10  $\mu\text{L}$  of soybean oil following hydrolysis with sodium carbonate. Values are expressed at mean  $\pm$  standard deviation (SD) of  $n=3$  per oil volume. Data were analyzed by one-way ANOVA and Tukey's post-hoc test. Different letters within each surrogate are significantly different ( $p < 0.05$ ).

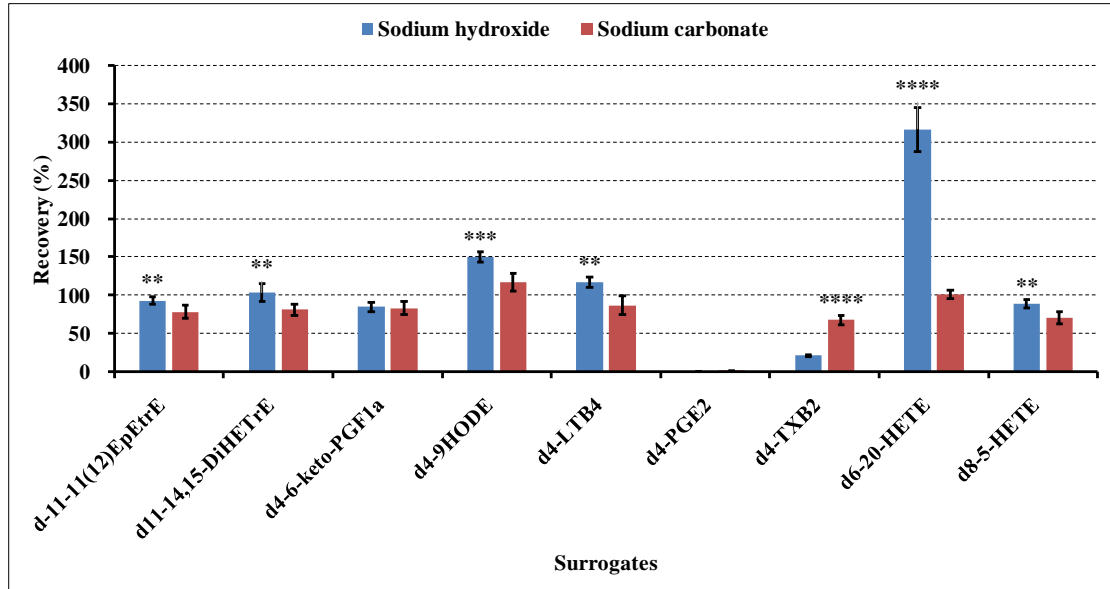

**Supplementary Figure 2.** Surrogate standard recovery following hydrolysis of 1  $\mu$ L soybean oil with sodium hydroxide (NaOH) or sodium carbonate (Na<sub>2</sub>CO<sub>3</sub>). Values are expressed at mean  $\pm$  standard deviation (SD) of n=5 per base condition. Data were analyzed by one-way ANOVA and Tukey's post-hoc test. Different letters within each surrogate are significantly different. \*  $p < 0.05$ ; \*\*  $p < 0.01$ ; \*\*\*  $p < 0.001$ ; \*\*\*\*  $p < 0.0001$ .



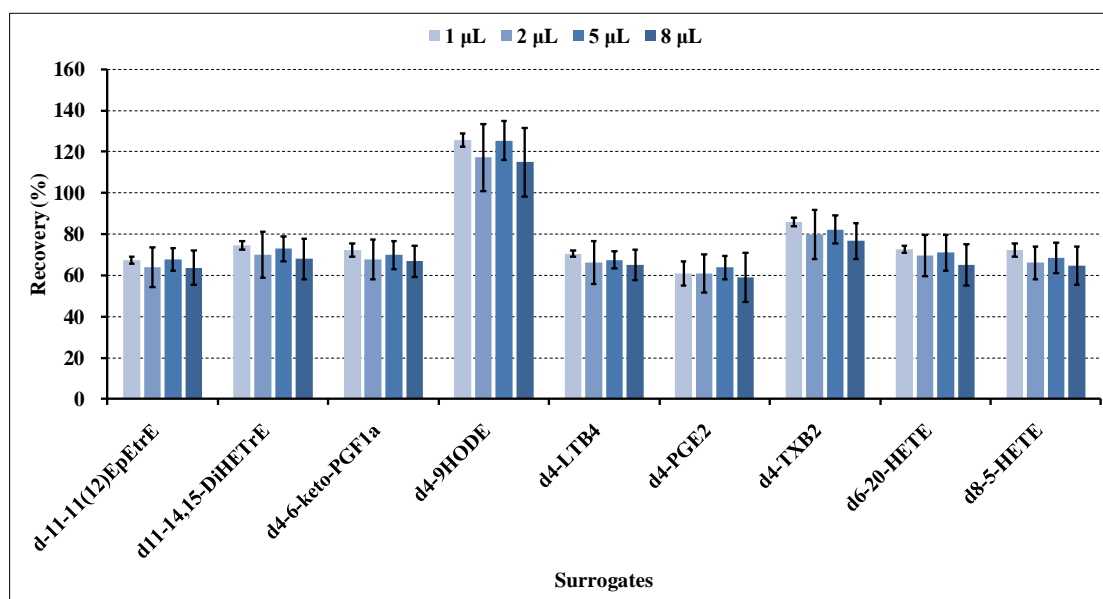

**Supplementary Figure 3.** Surrogate standard recovery following separation of free oxylipins from esterified oxylipins in 1, 2, 4 and 8  $\mu\text{L}$  oil. Values are expressed at mean  $\pm$  standard deviation (SD) of  $n=3$  per oil volume. One-way ANOVA followed by Tukey's post-hoc test revealed no significant differences amongst the groups.

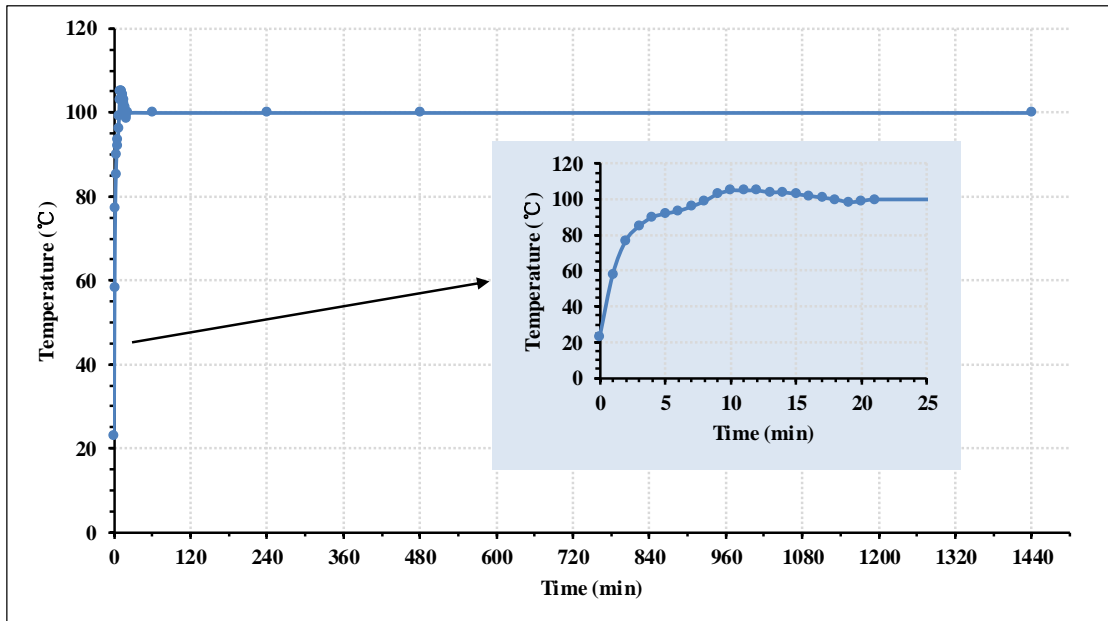

**Supplementary Figure 4.** Change in temperature over time of soybean oil heated at 100°C for 24 h (n=1 ; this is the sample in the 6<sup>th</sup> tube, next to 5 others sampled for oxylipin and fatty acid analysis throughout the experiment).

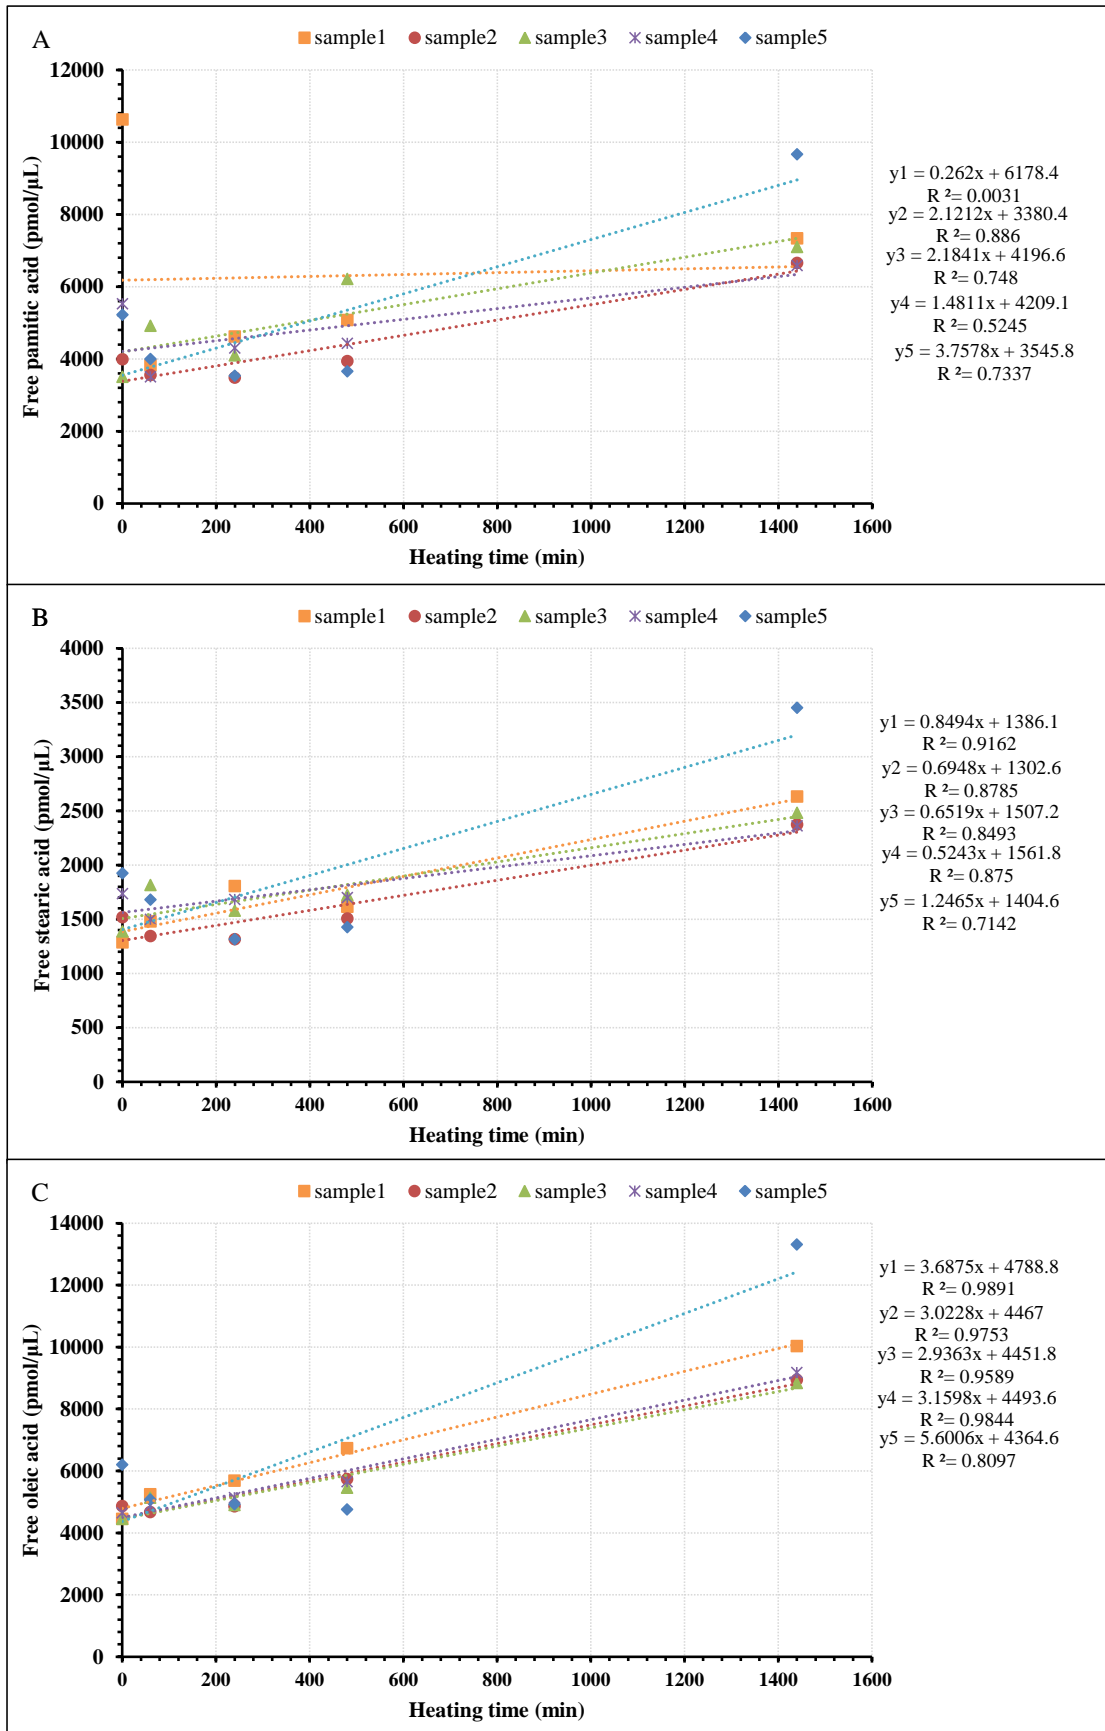

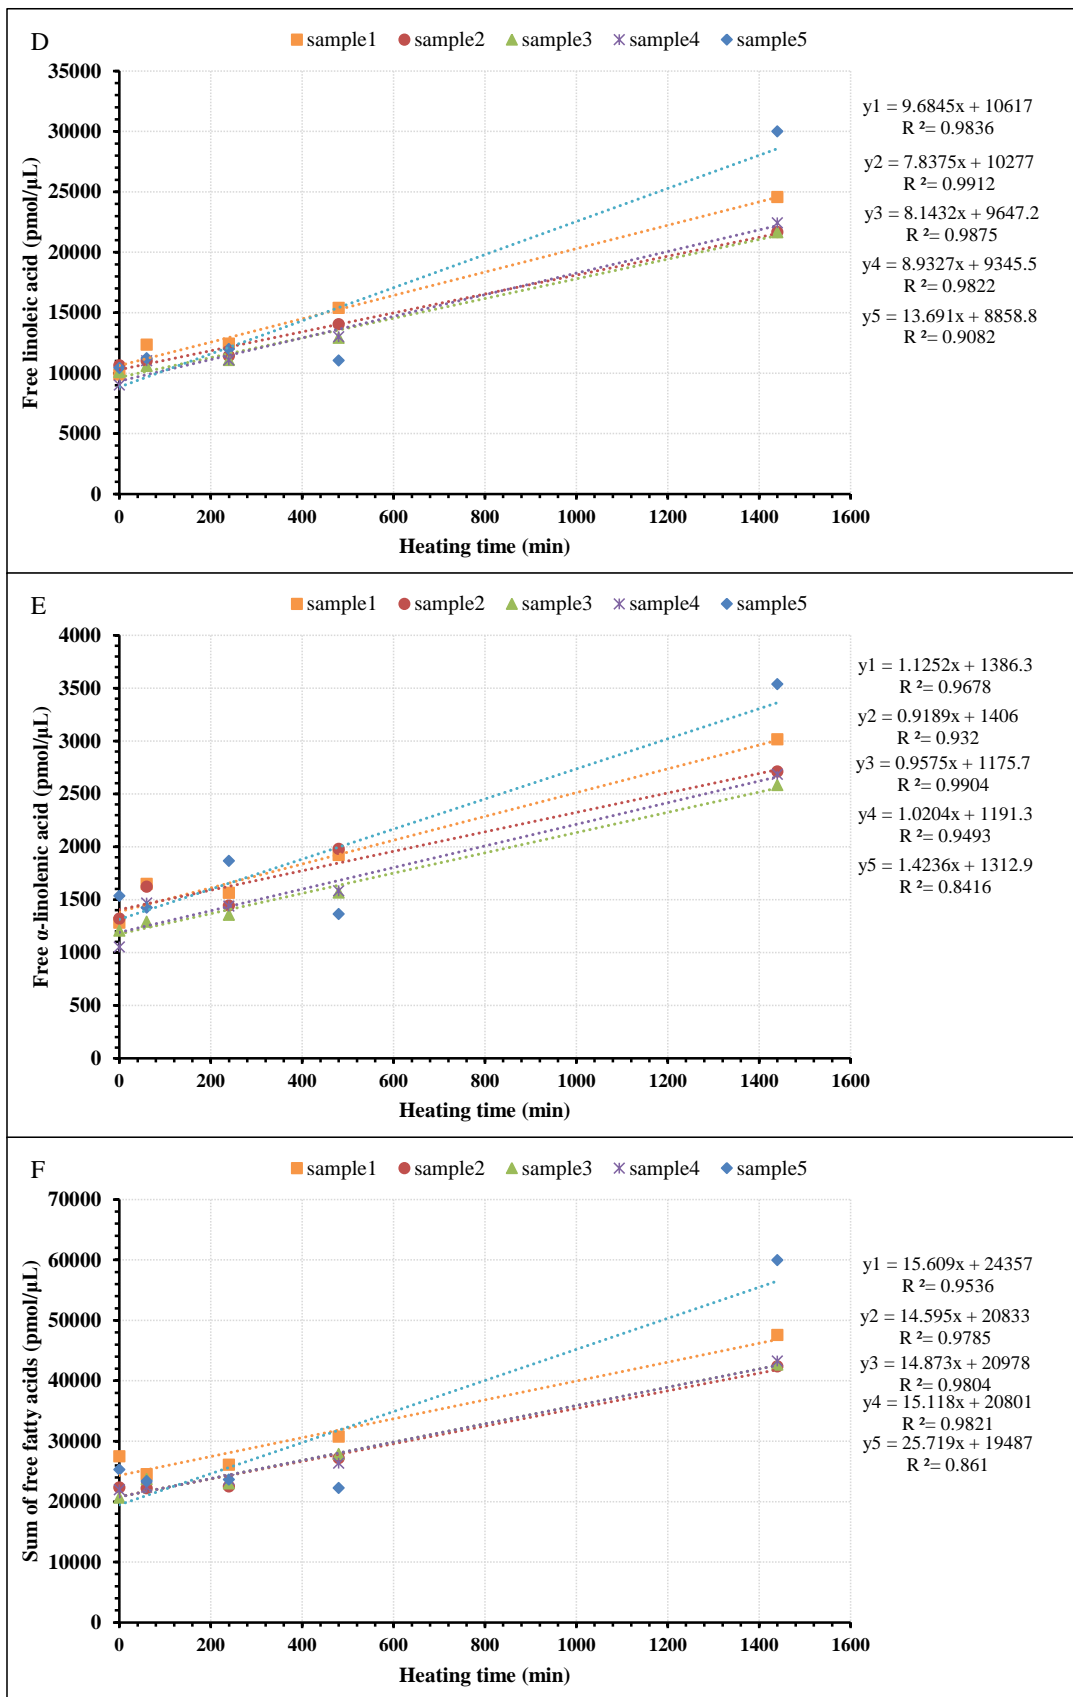

**Supplementary Figure 5.** Linear fit of the Concentration-Time plot of free palmitic acid (A), stearic acid (B), oleic acid (C), linoleic acid (LA; D),  $\alpha$ -linolenic acid (ALA; E) and sum of free fatty acids (F) in soybean oil heated for 24 h (n=5 per time-point).

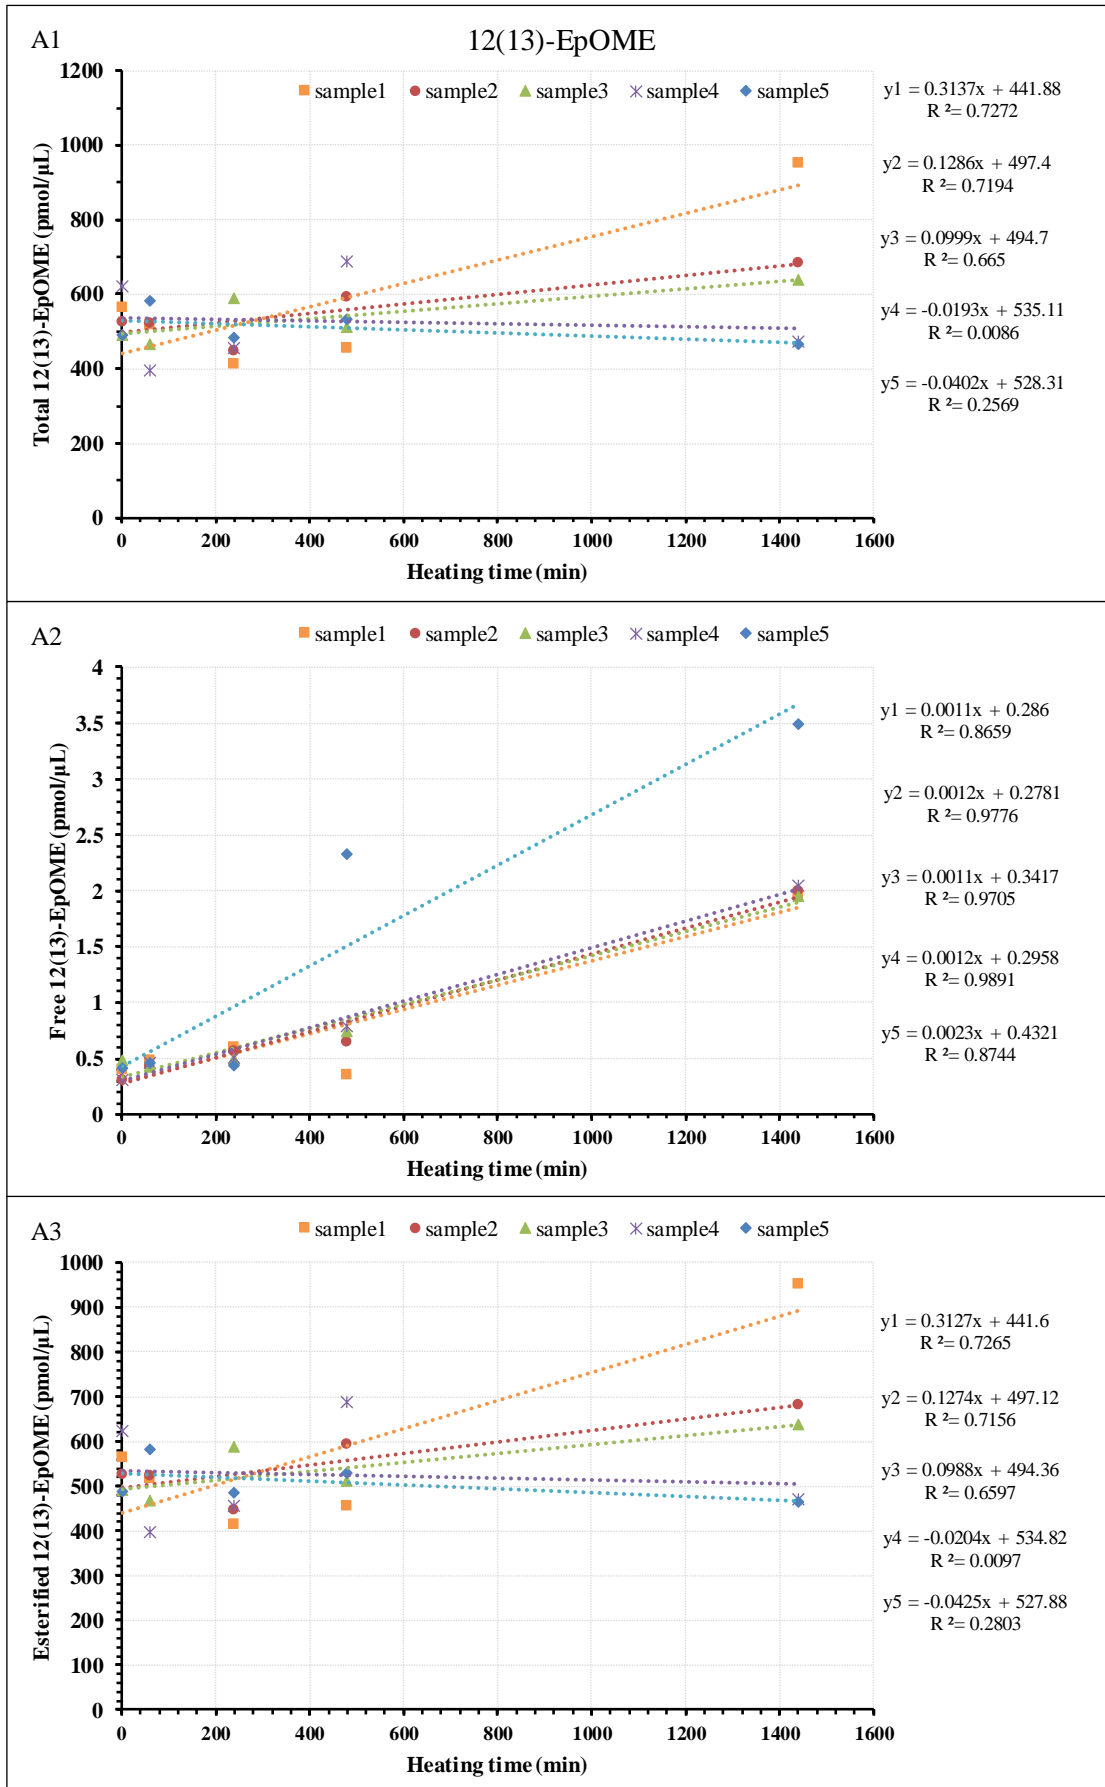

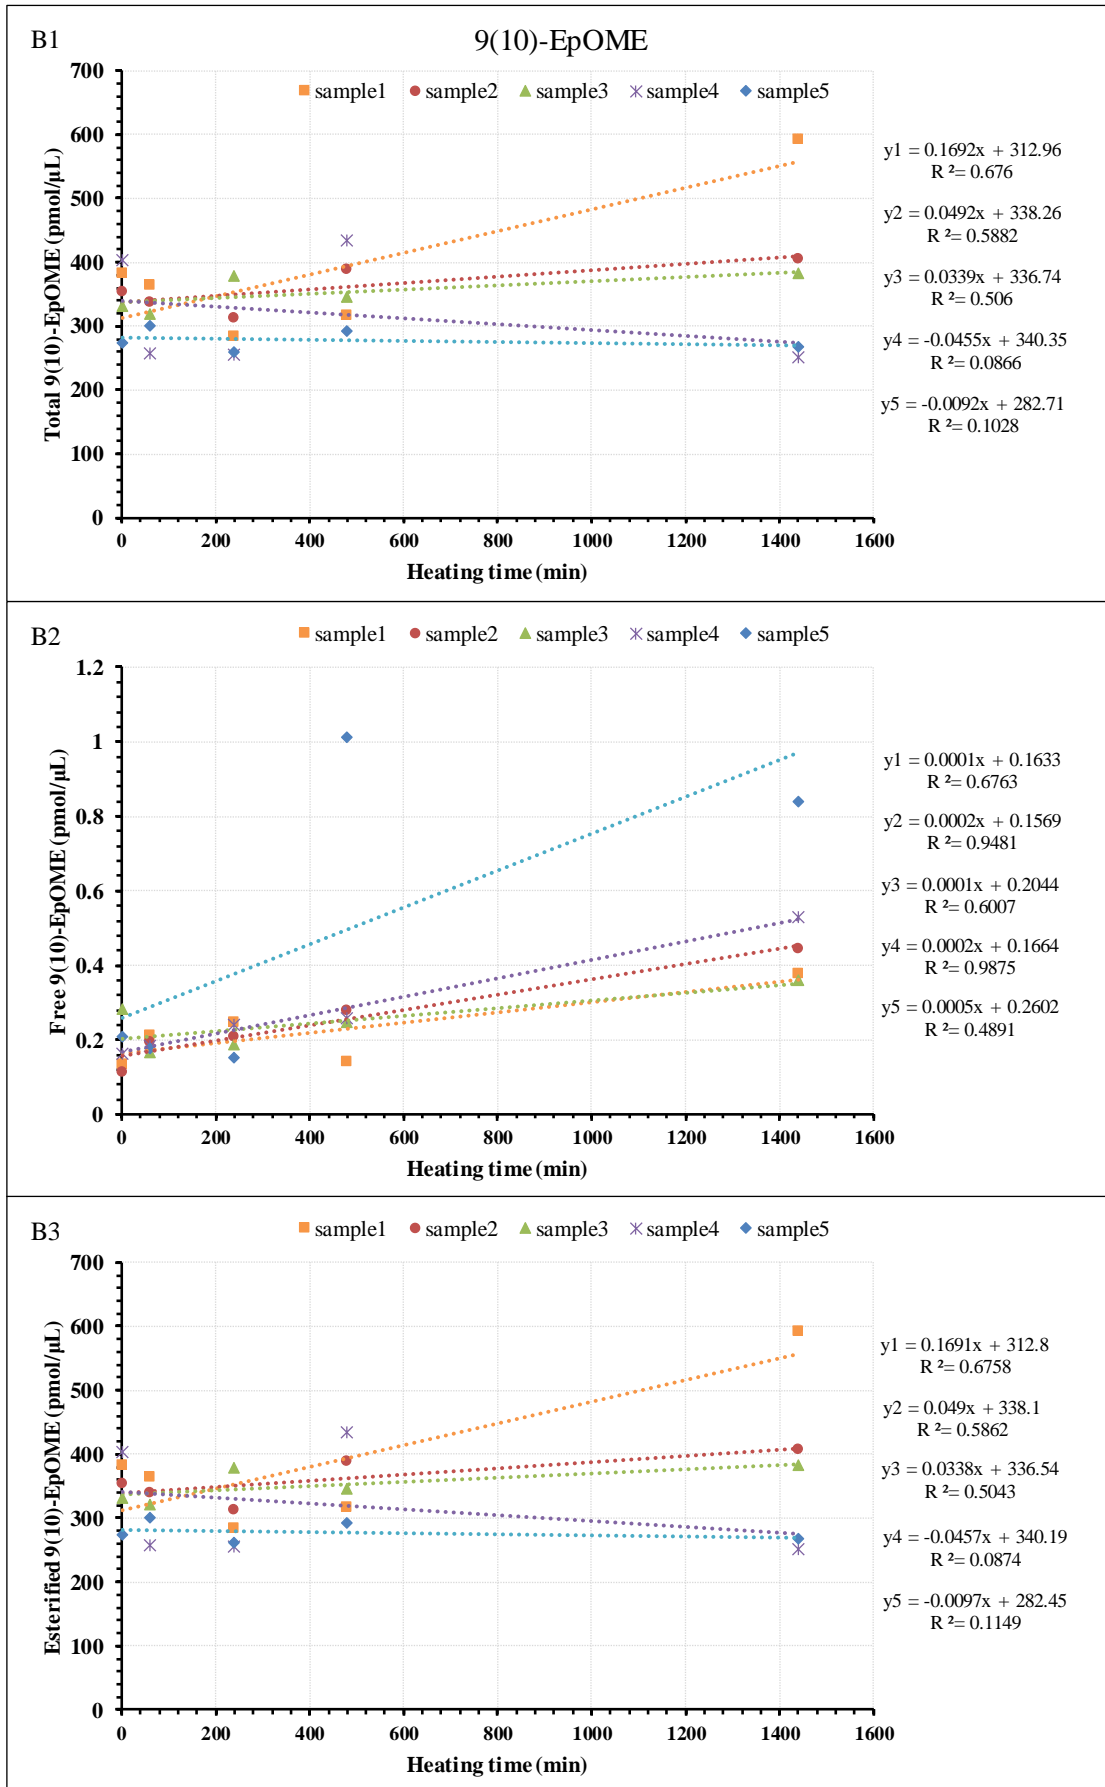

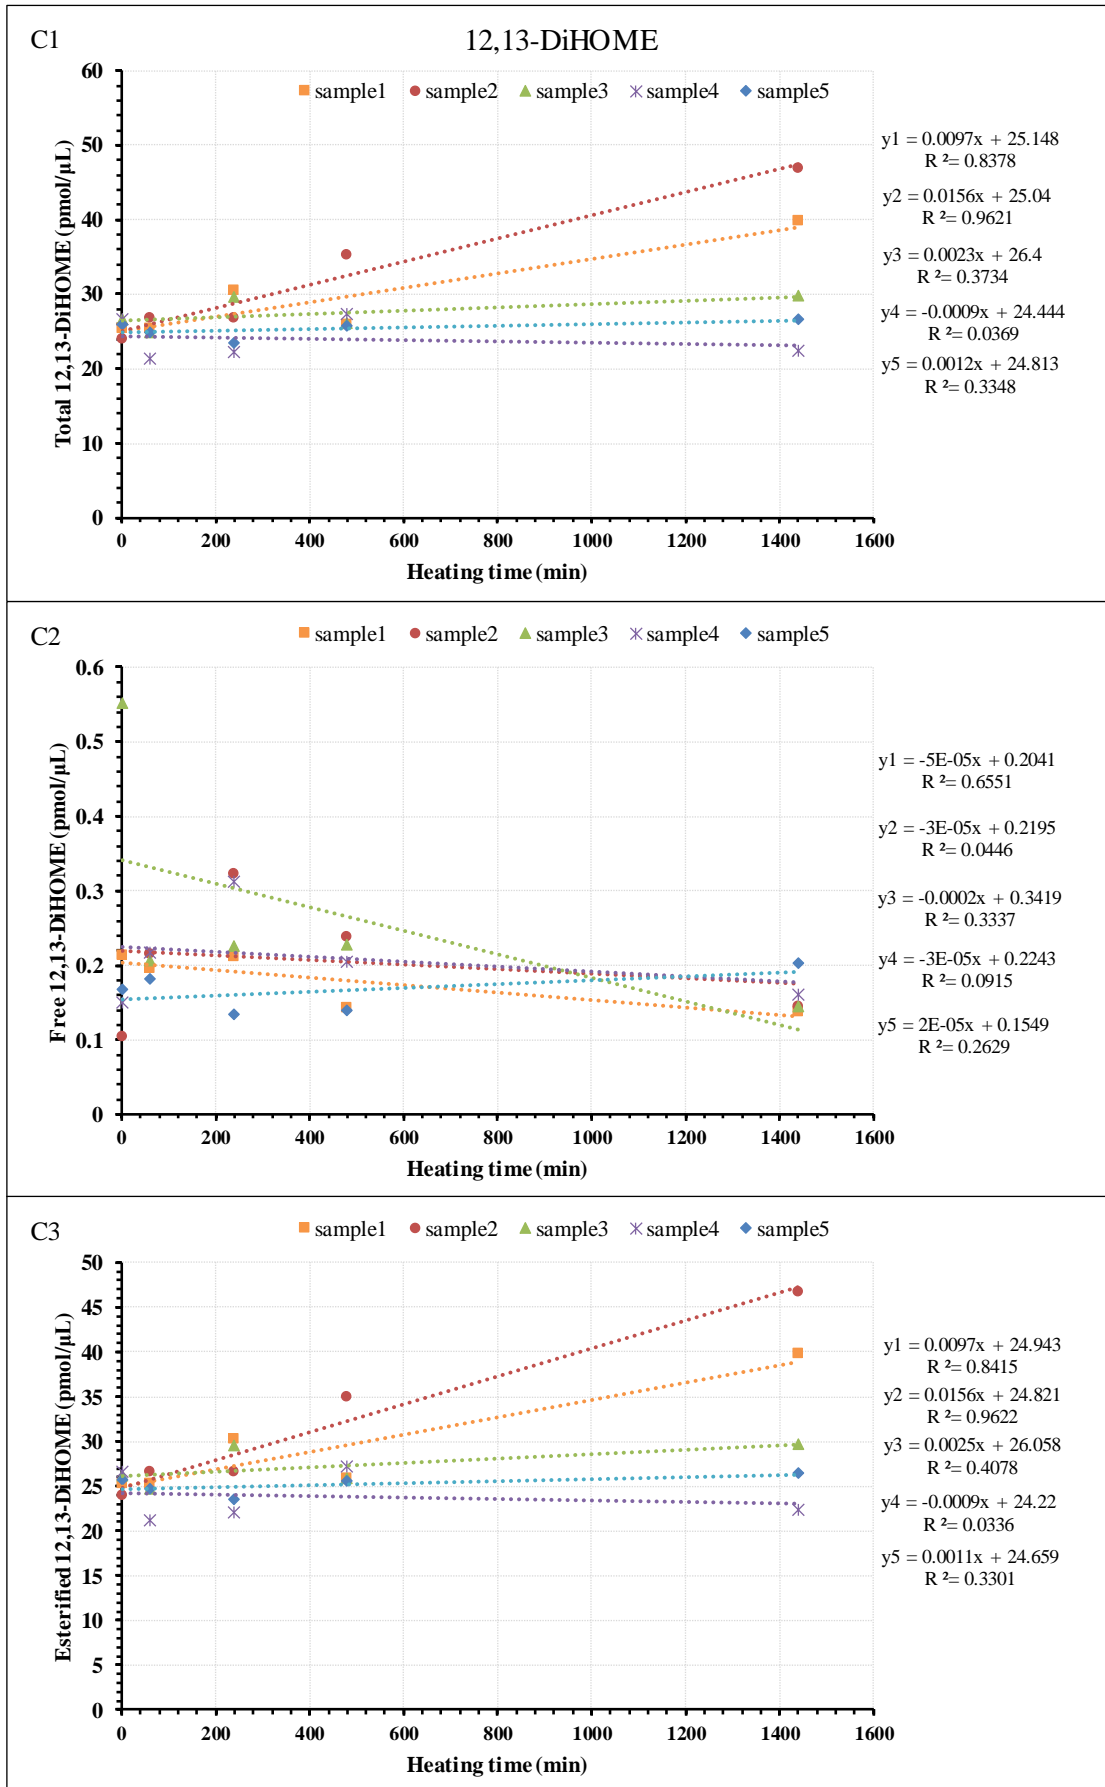

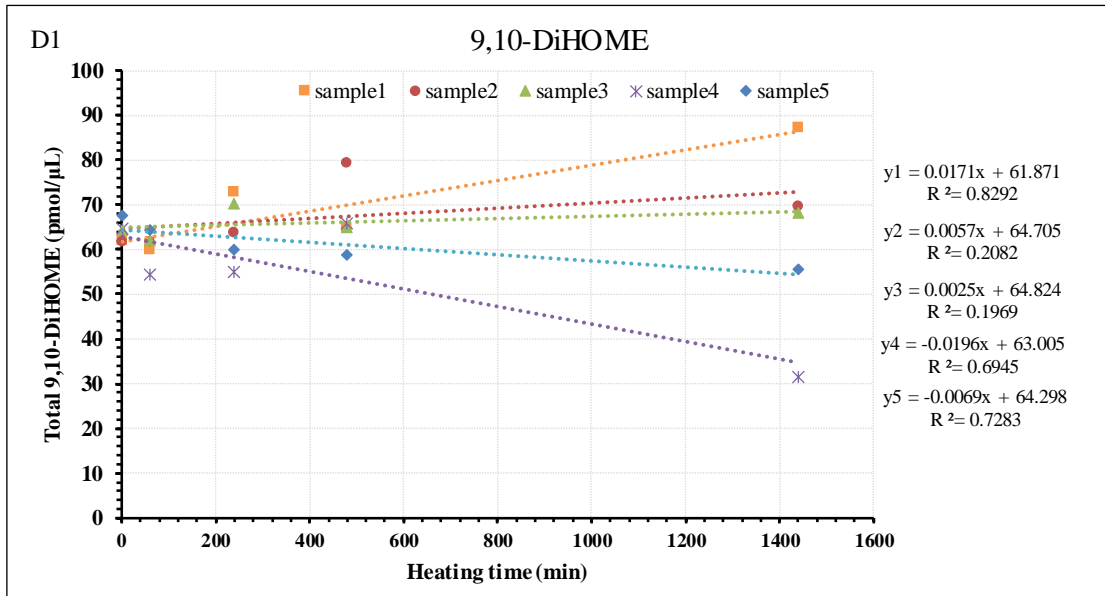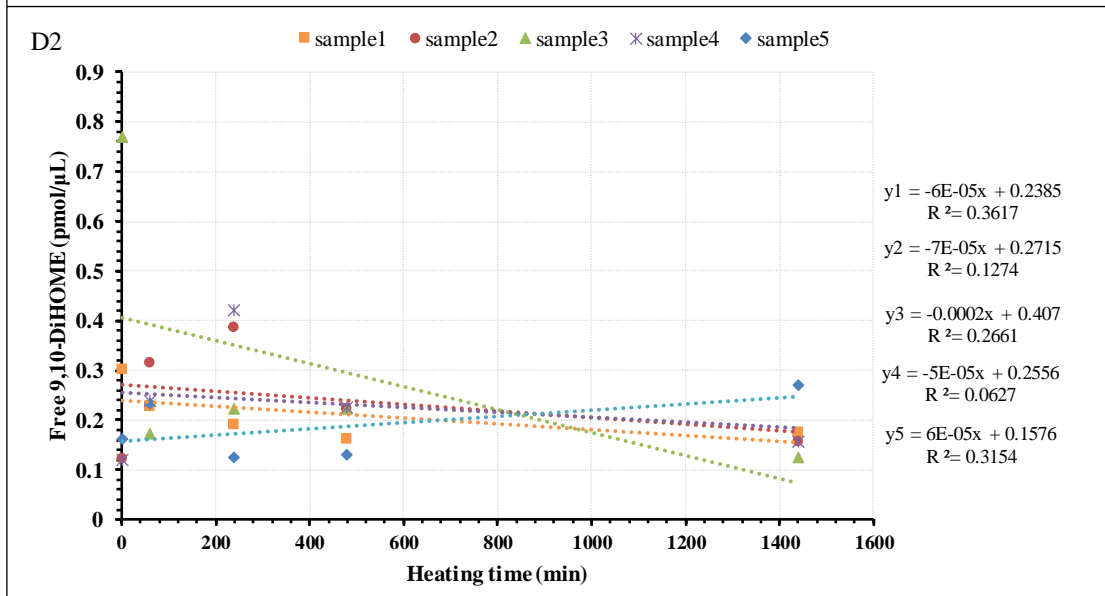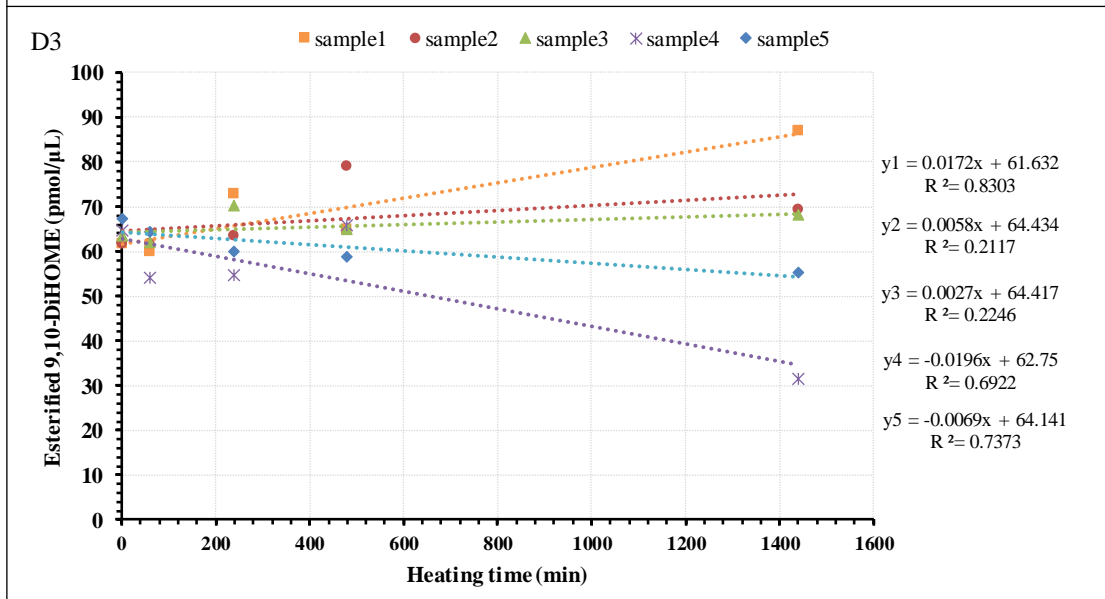



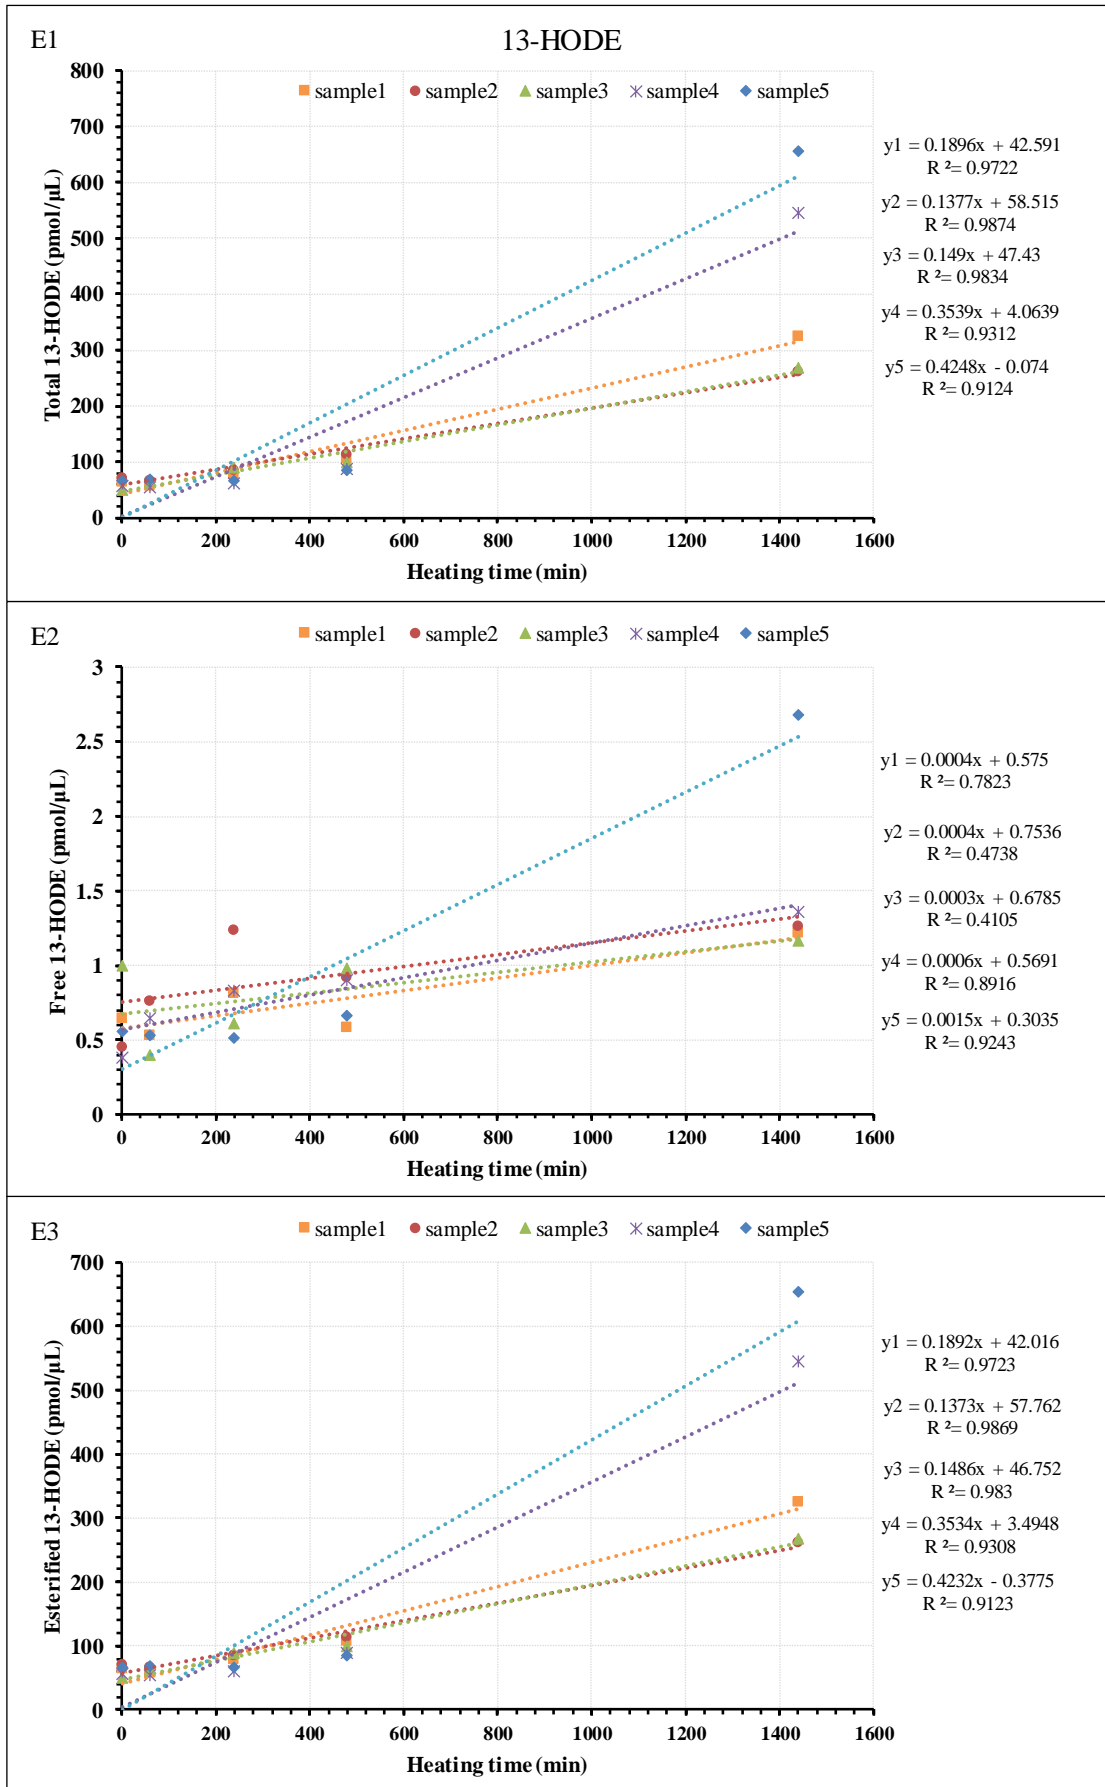

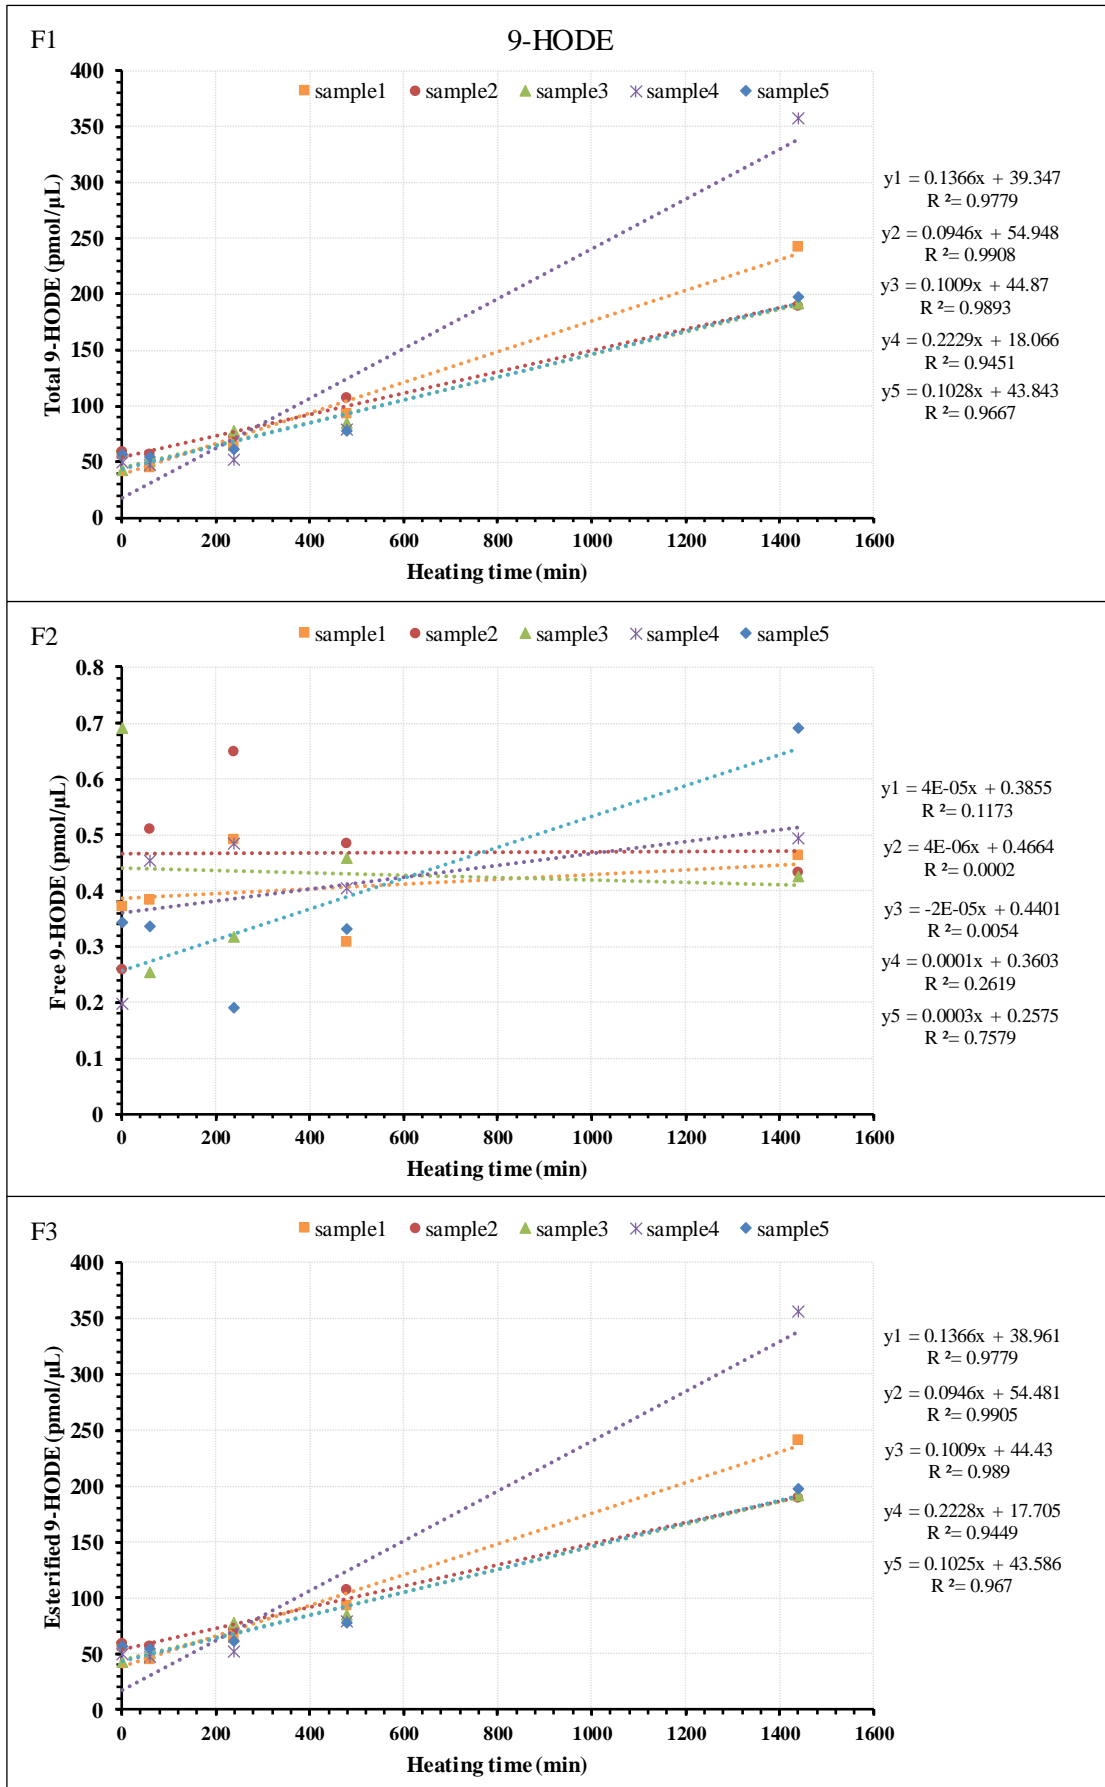

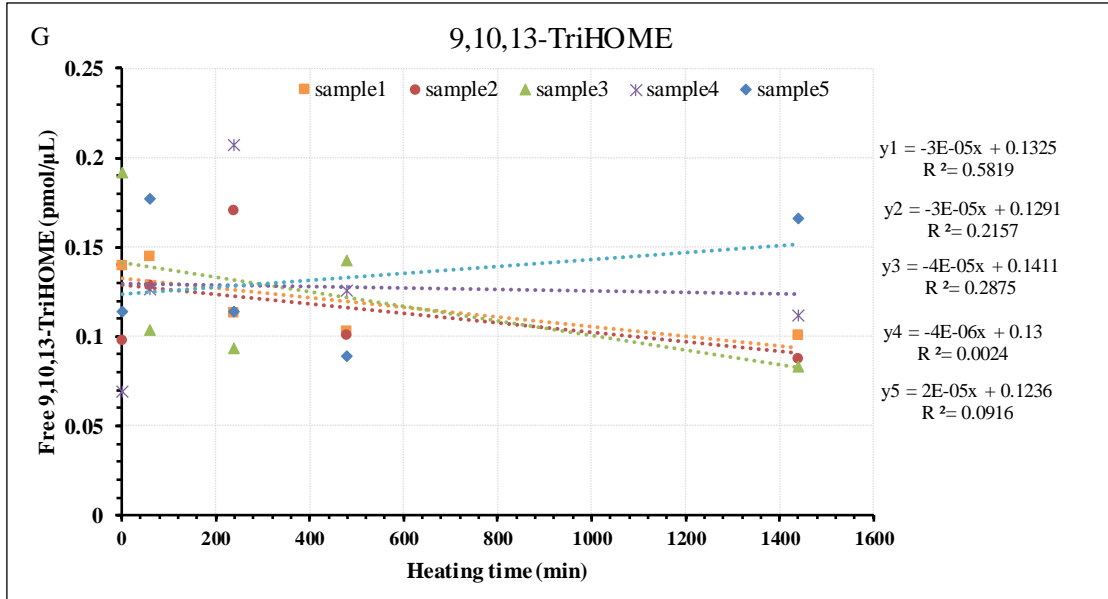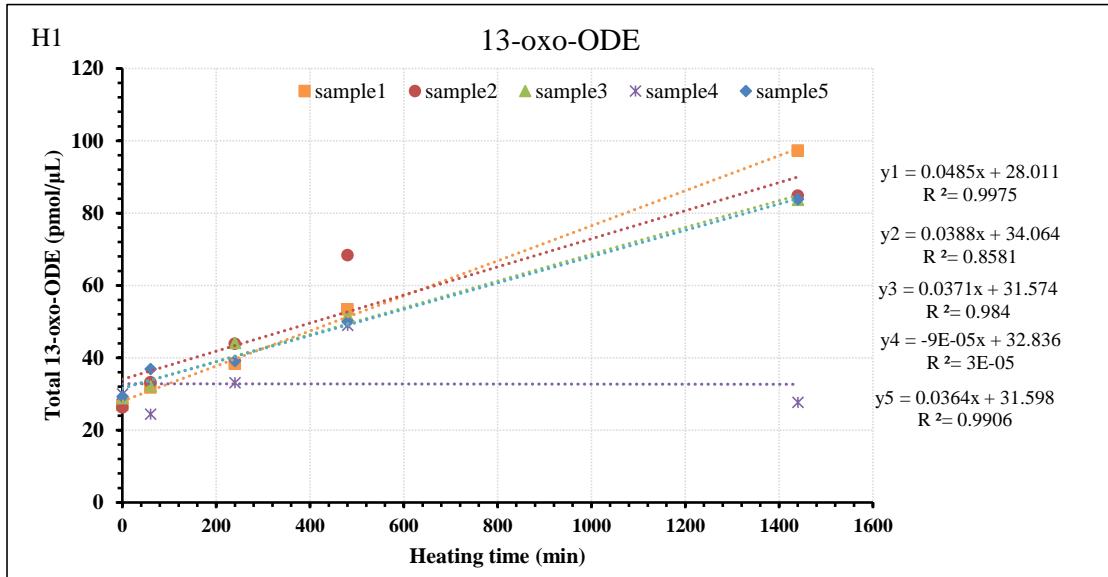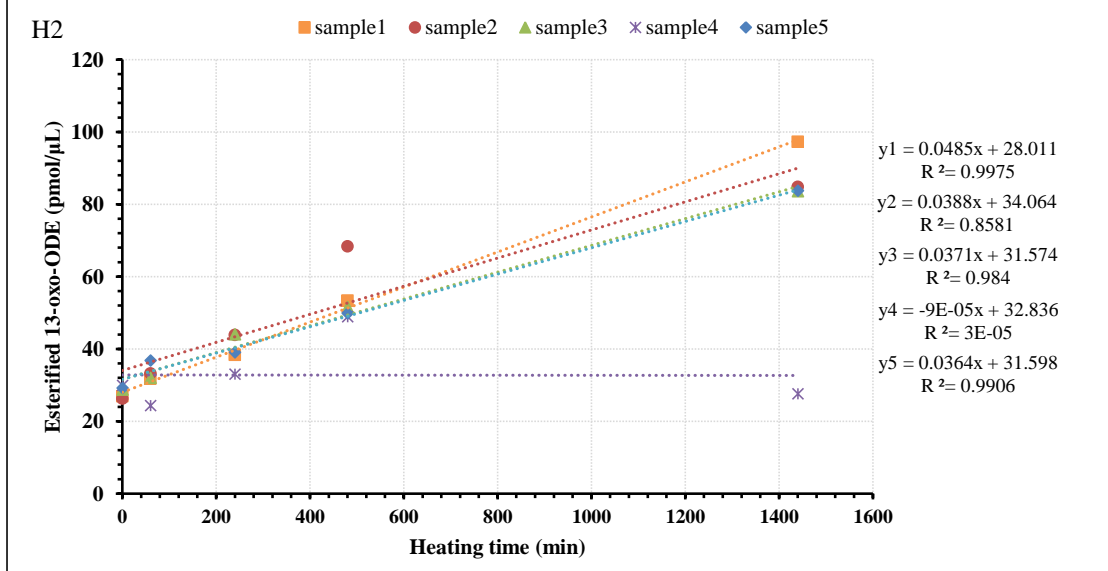

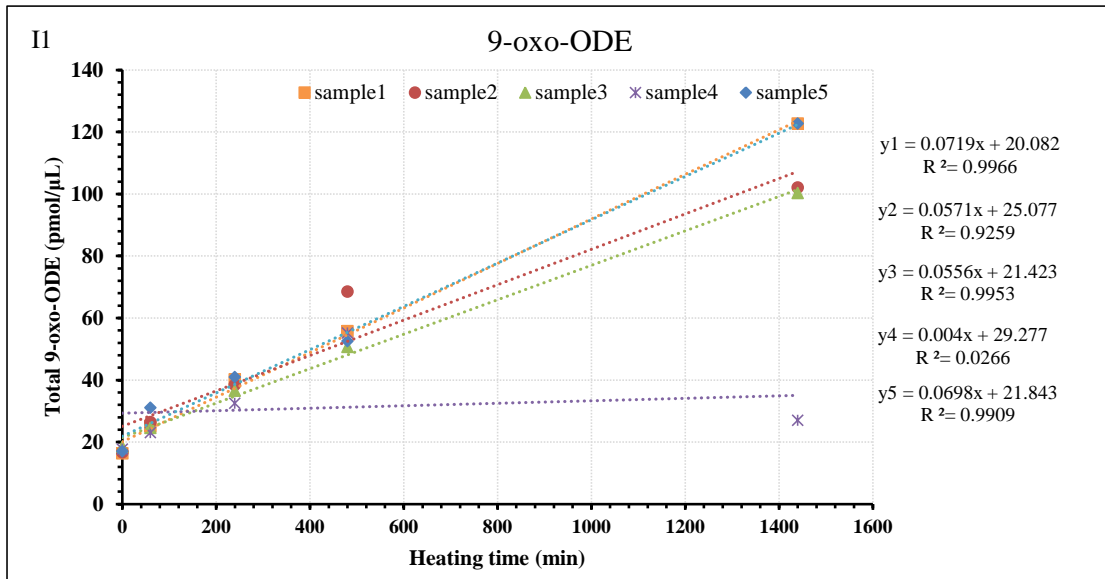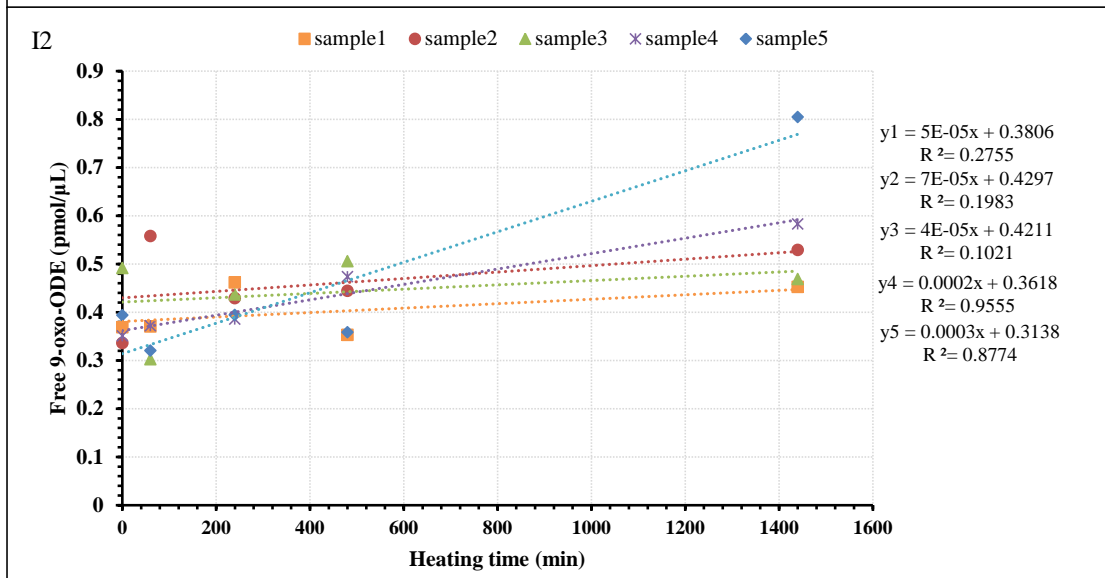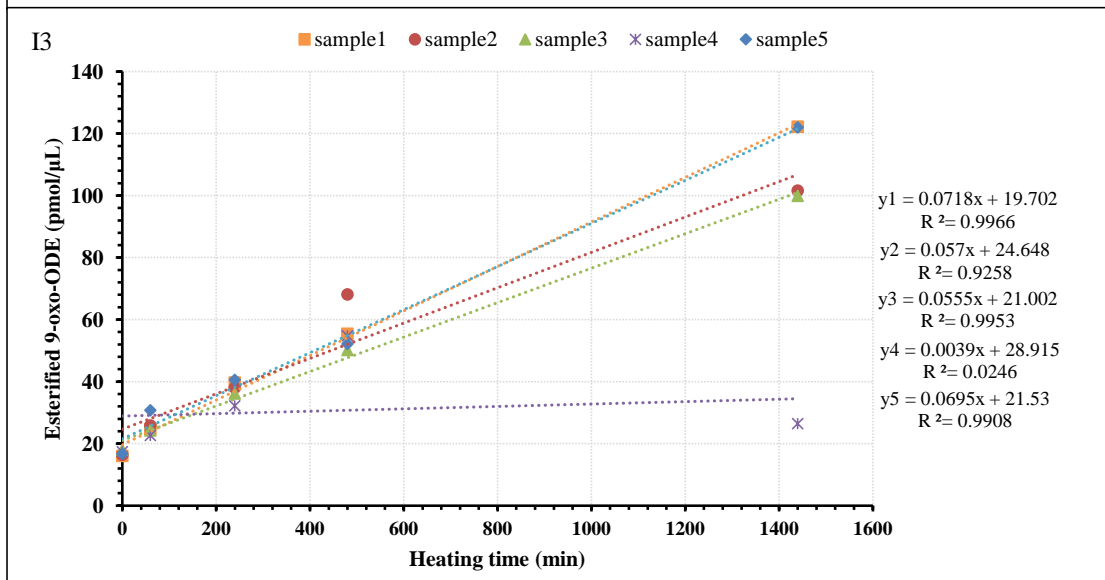

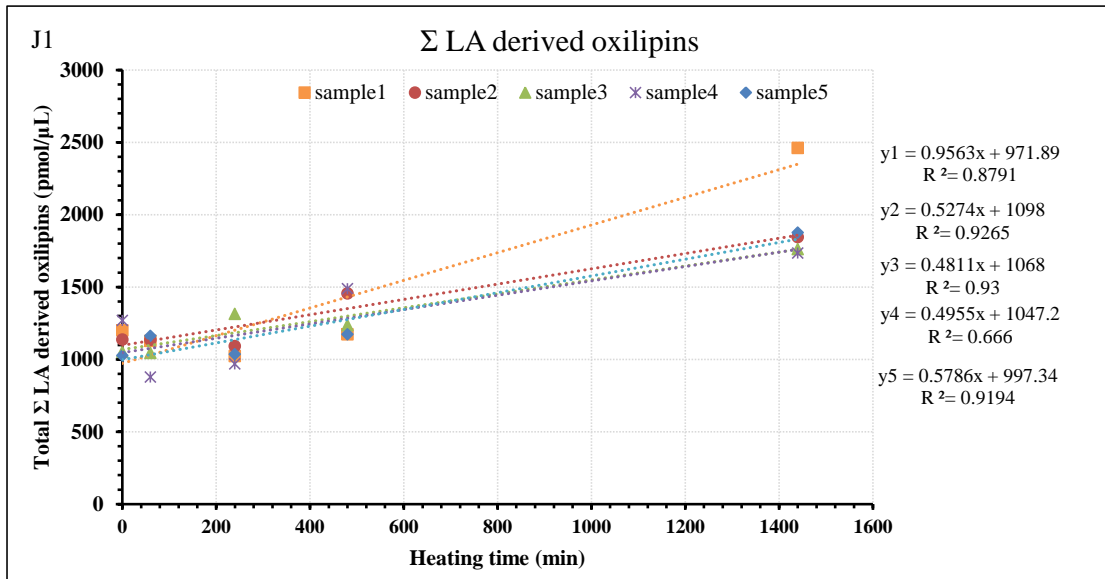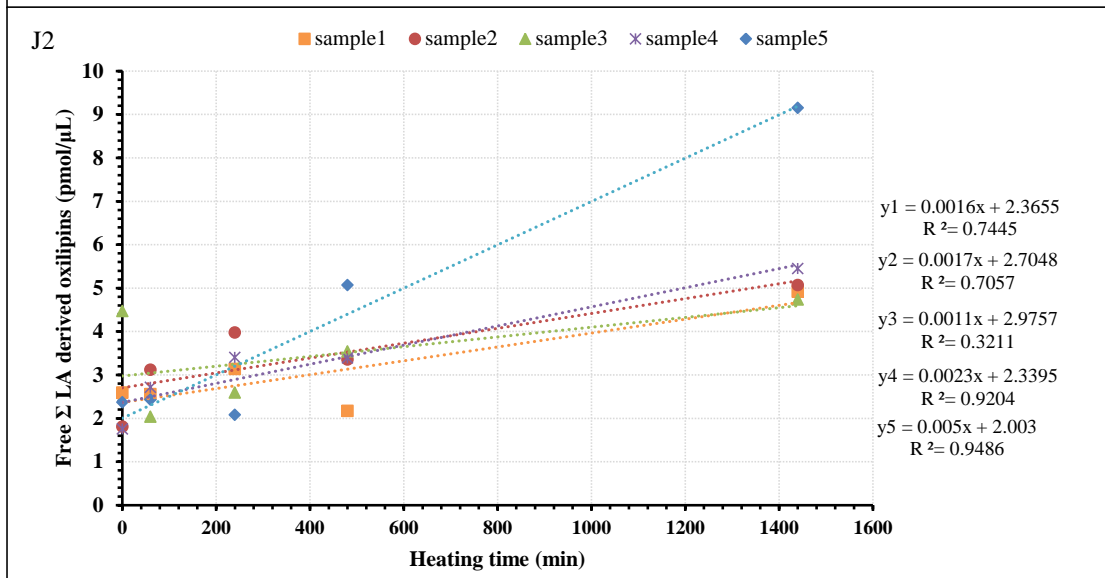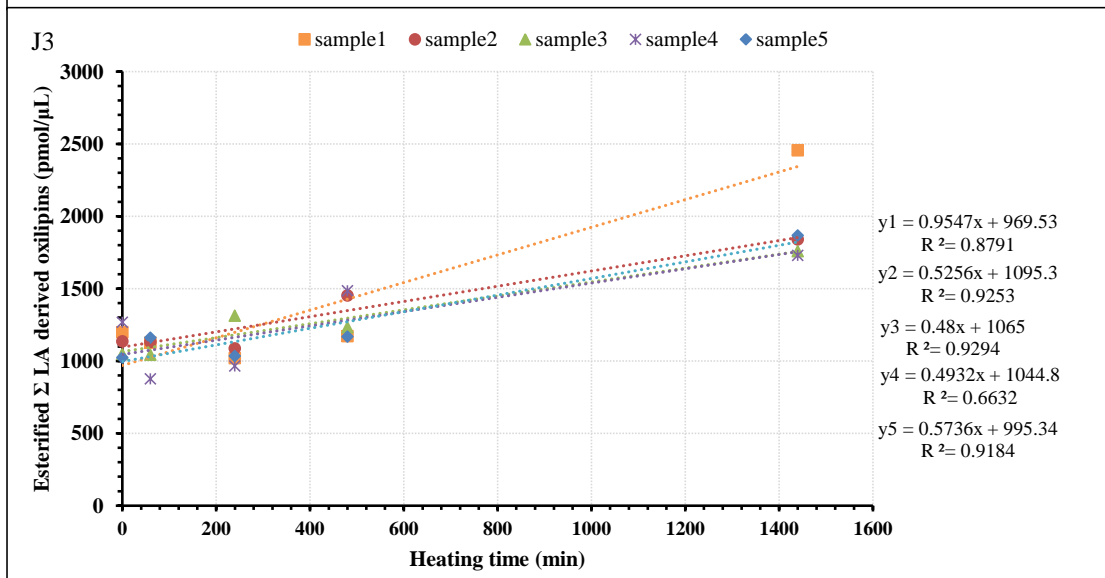

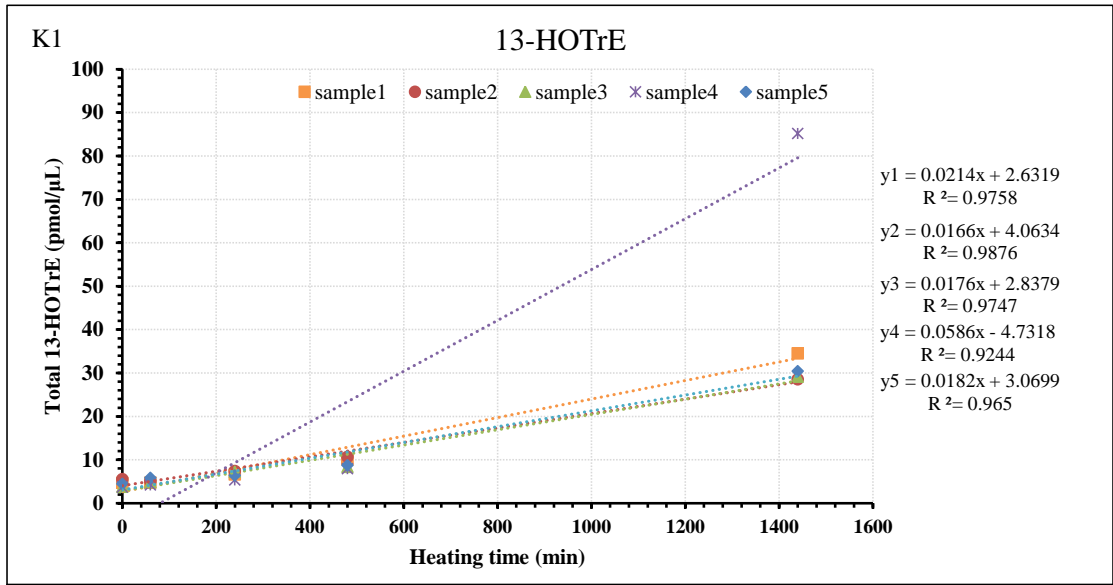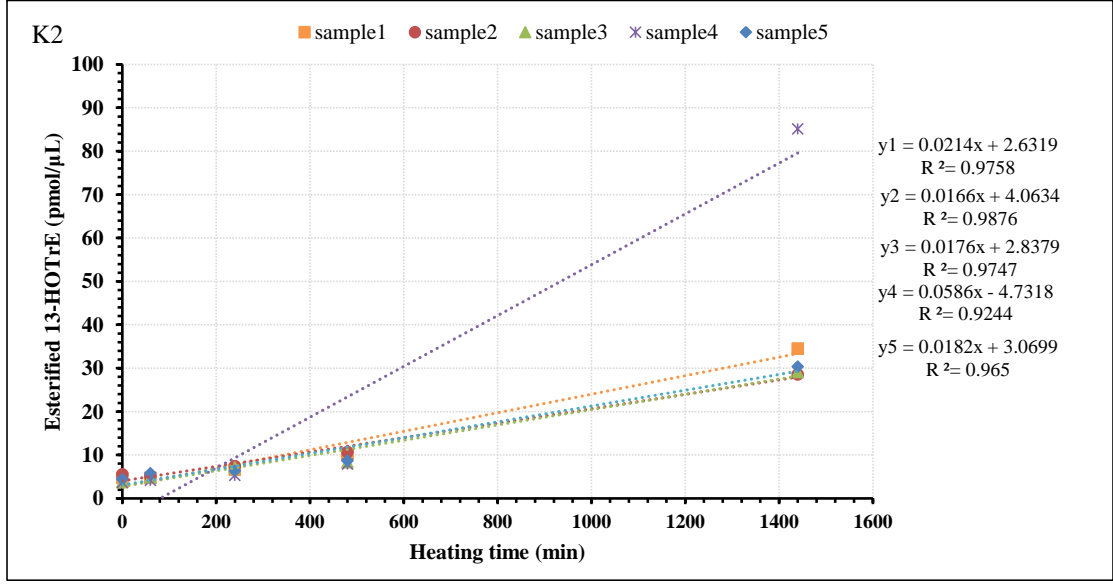

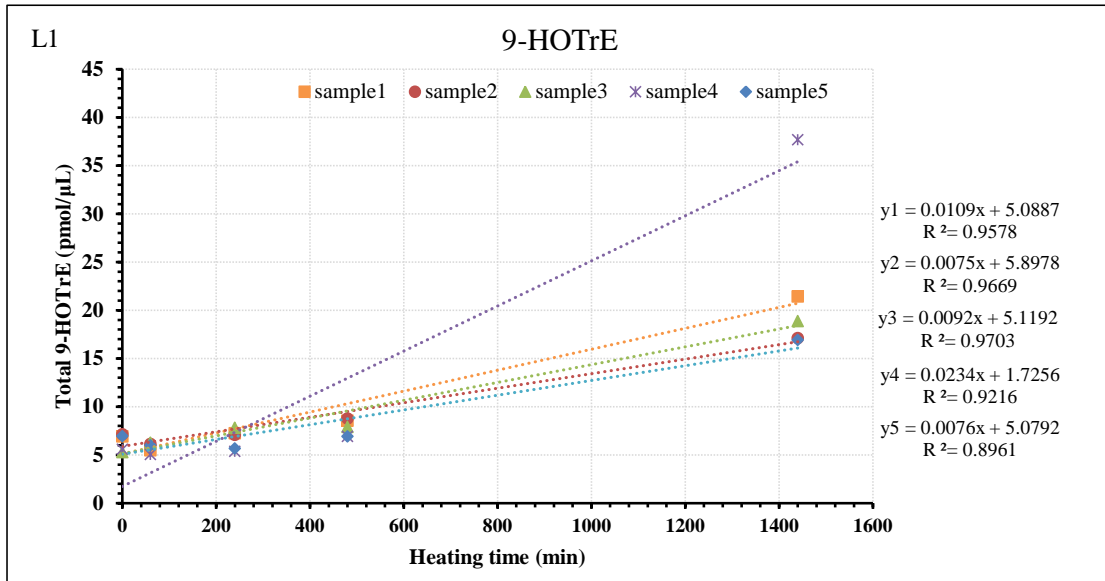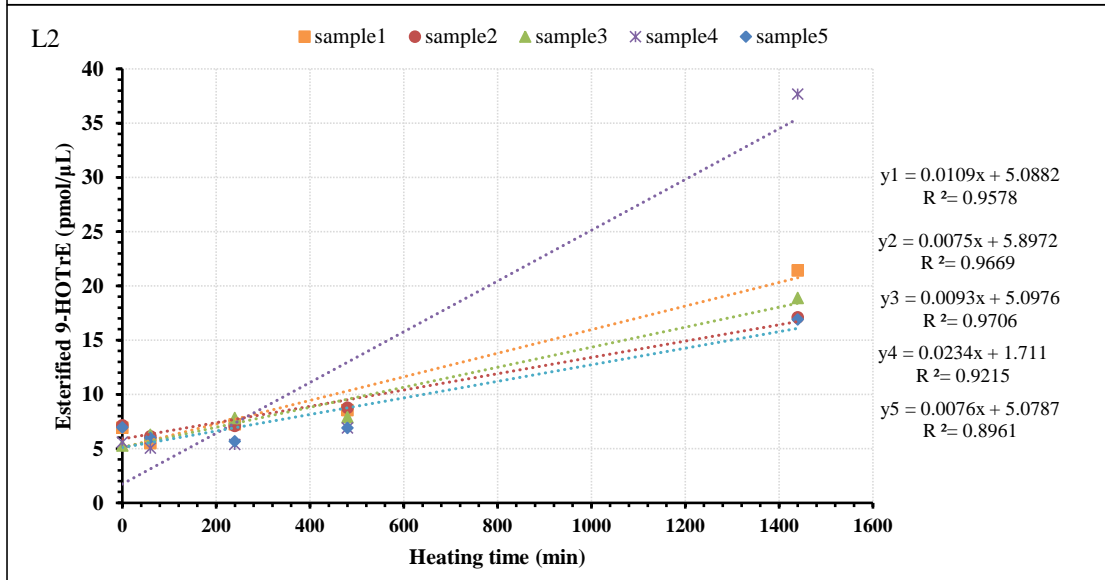

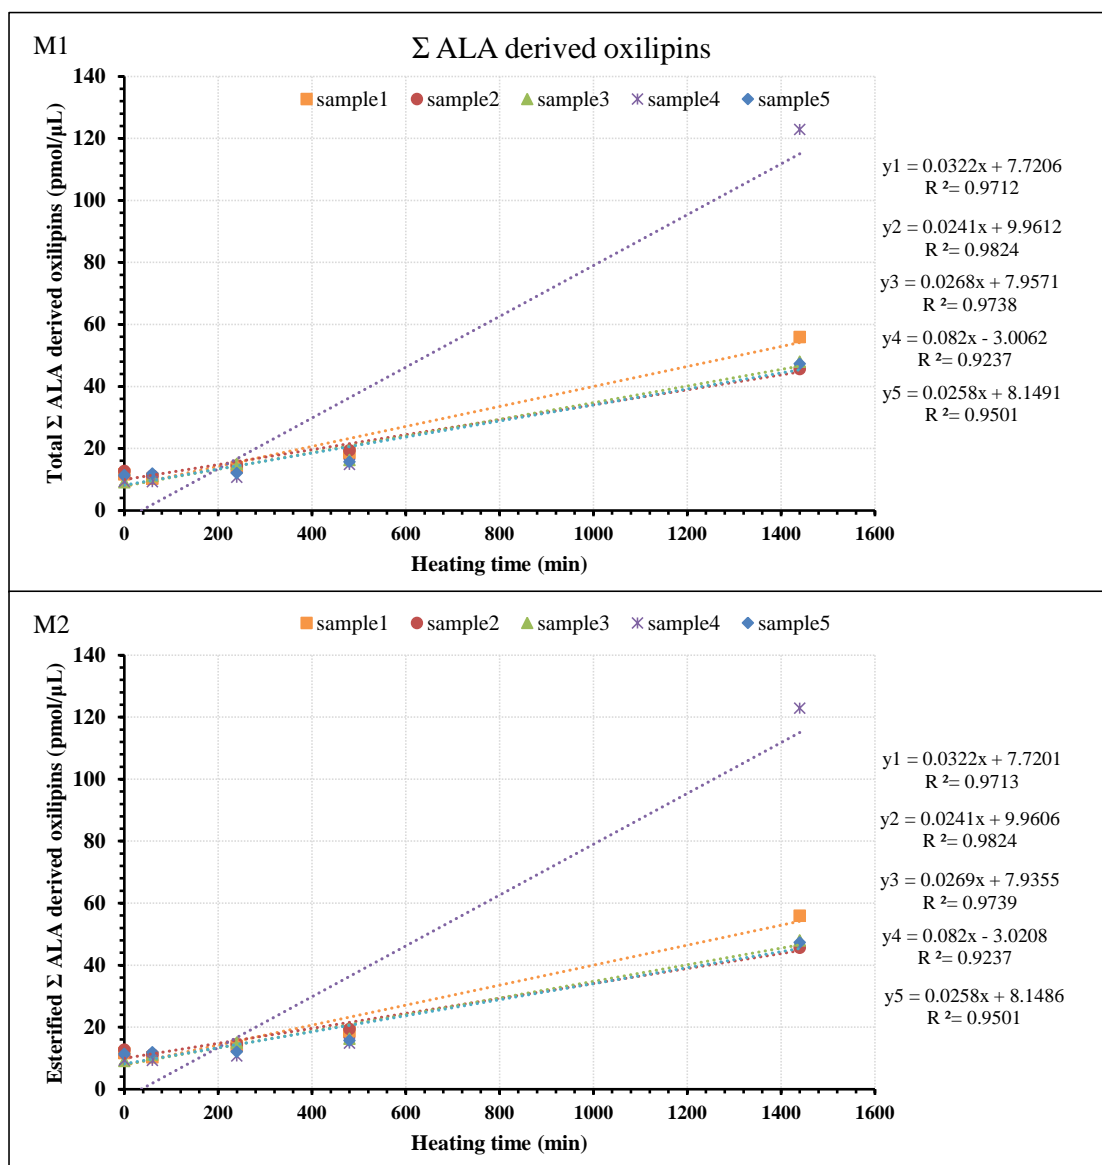

**Supplementary Figure 6.** Linear regression fit for Concentration-Time plots of total, free and esterified oxylipins formed in soybean oil heated for 24 h. 12(13)-EpOME (total/free/esterified, A1/A2/A3); 9(10)-EpOME (total/free/esterified, B1/B2/B3); 12,13-DiHOME (total/free/esterified, C1/C2/C3); 9,10-DiHOME (total/free/esterified, D1/D2/D3); 13-HODE (total/free/esterified, E1/E2/E3); 9-HODE (total/free/esterified, F1/F2/F3); 9,10,13-TriHOME (free, G); 13-oxo-ODE (total/esterified, H1/H2); 9-oxo-ODE (total/free/esterified, I1/I2/I3);  $\Sigma$  LA-derived oxylipins (total/free/esterified, J1/J2/J3); 13-HOTrE (total/esterified, K1/K2); 9-HOTrE (total/esterified, L1/L2);  $\Sigma$  ALA-derived oxylipins (total/esterified, M1/M2). (n=5 per time point)



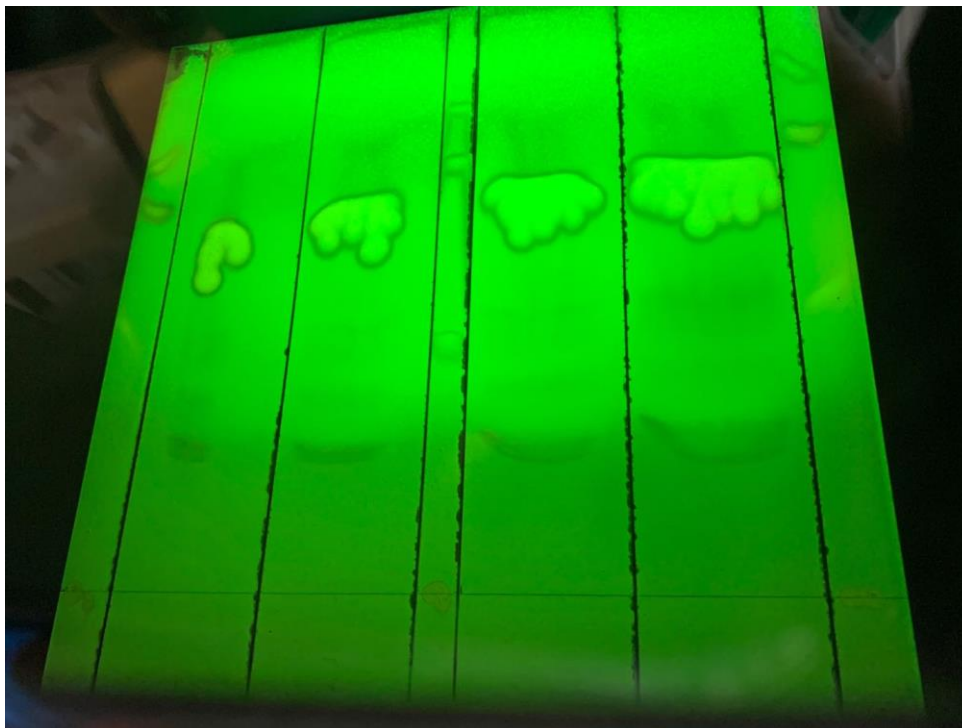

**Supplementary Figure 7.** Thin layer chromatography (TLC) of various soybean oil volumes, to determine the optimal amount that separates free fatty acids. Sample from the left to right lane are: TLC standard mix, 1  $\mu\text{L}$  soybean oil, 2  $\mu\text{L}$  soybean oil, TLC standard mix, 3  $\mu\text{L}$  soybean oil, 4  $\mu\text{L}$  soybean oil, and TLC standard mix. The TLC standard mix contained phospholipids, cholesterol, FFAs, TAGs and cholesteryl esters. Phospholipids appear at the bottom, followed by cholesterol, FFAs, TAGs and cholesteryl esters.
